# Supplementary material for: Characterization of SCO4439, a D-alanyl-D-alanine carboxypeptidase involved in spore cell wall maturation, resistance and germination in Streptomyces coelicolor
Source: Springer Nature journal article supplement (doi:10.1038/srep21659), 2016-02-12

**Characterization of SCO4439, a D-alanyl-D-alanine carboxypeptidase involved in spore cell wall maturation, resistance, and germination in *Streptomyces coelicolor***

Beatriz Riostras<sup>1</sup>, Paula Yagüe<sup>1</sup>, María Teresa López-García<sup>1</sup>, Nathaly Gonzalez-Quiñonez<sup>1</sup>, Elisa Binda<sup>2,3</sup>, Flavia Marinelli<sup>2,3</sup> & Angel Manteca,<sup>1\*</sup>

<sup>1</sup> Área de Microbiología, Departamento de Biología Funcional and IUOPA, Facultad de Medicina, Universidad de Oviedo, 33006 Oviedo, Spain.

<sup>2</sup> Department of Biotechnology and Life Sciences, University of Insubria, via J. H. Dunant 3, 21100 Varese, Italy.

<sup>3</sup> “The Protein Factory” Research Center, Politecnico of Milano, ICRM CNR Milano and University of Insubria, 21100Varese, Italy.

**Supplementary Fig. S1.** Master images used to quantify spore diameters in *S. coelicolor* SCO4439::Tn5062, and SCO4439::Tn5062[pBRB3\*].

**Supplementary Fig. S2.** Master images used to quantify spore diameters in *S. coelicolor* [pMS82] and SCO4439::Tn5062[pBRB3].

**Supplementary Movie 1.** Time-lapse confocal microscopy of the germination of spores from the *S. coelicolor* wild type strain.

**Supplementary Movie 2.** Time-lapse confocal microscopy of the germination of spores from the *SCO4439::Tn5062* mutant strain.

**Supplementary Movie 3.** Time-lapse confocal microscopy of the germination of spores from the *SCO4439::Tn5062* [pBRB3] complemented mutant.

**Supplementary Movie 4.** Time-lapse confocal microscopy of the germination of spores from the *SCO4439::Tn5062* mutant harbouring the *SCO4439\** mutated gene (SCO4439::Tn5062[pBRB3\*]).

**Fig. S1. MASTER IMAGES USED TO QUANTIFY SPORE DIAMETER**

*Streptomyces coelicolor* 5-hours. Spore diameters measured are labelled by lines.

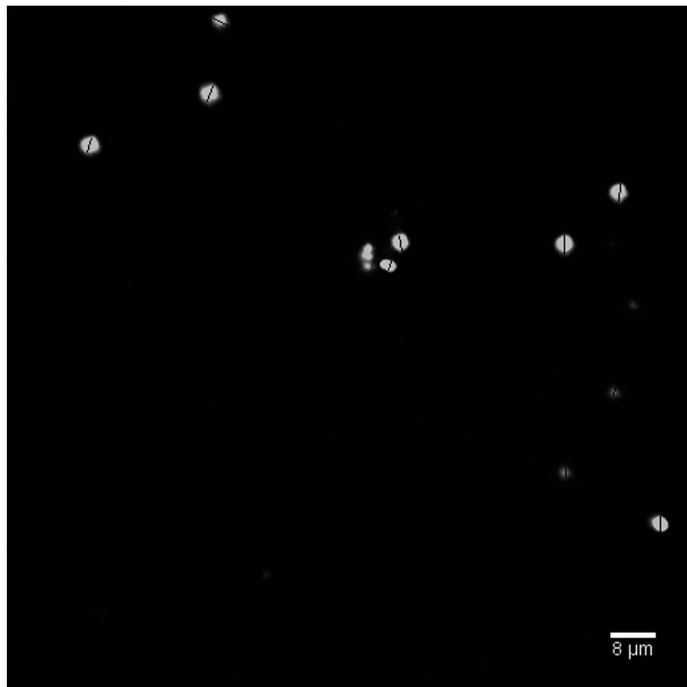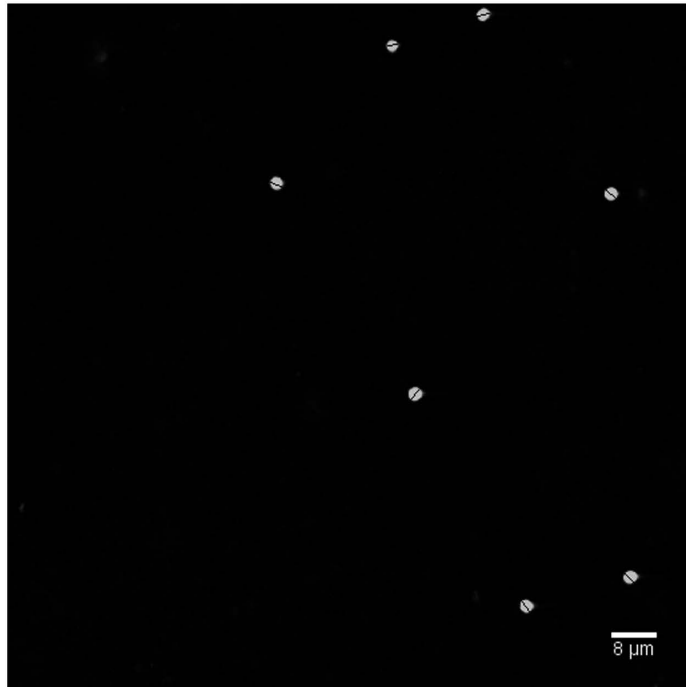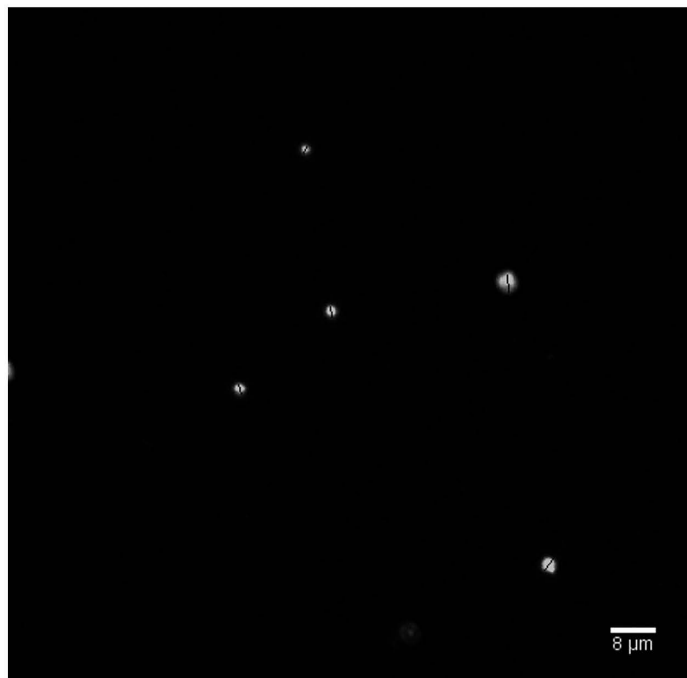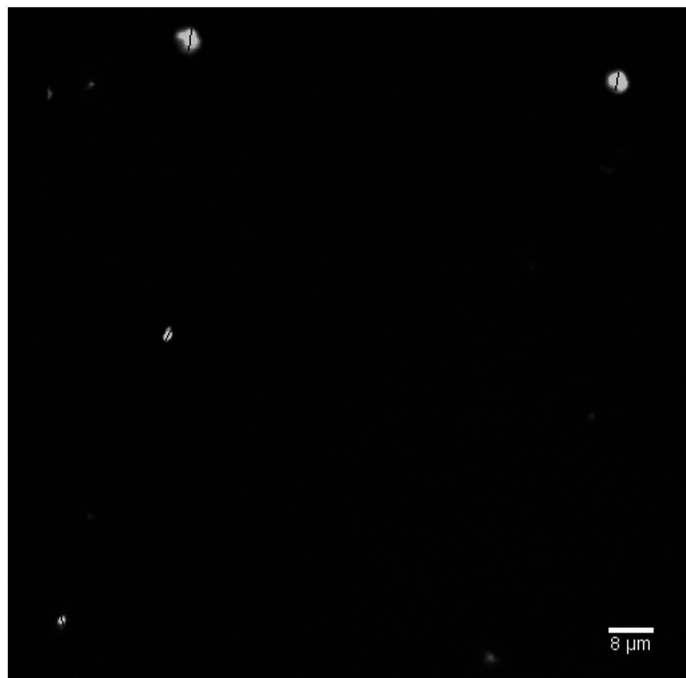

**Fig. S1. MASTER IMAGES USED TO QUANTIFY SPORE DIAMETER**

*Streptomyces coelicolor* 5-hours. Spore diameters measured are labelled by lines.

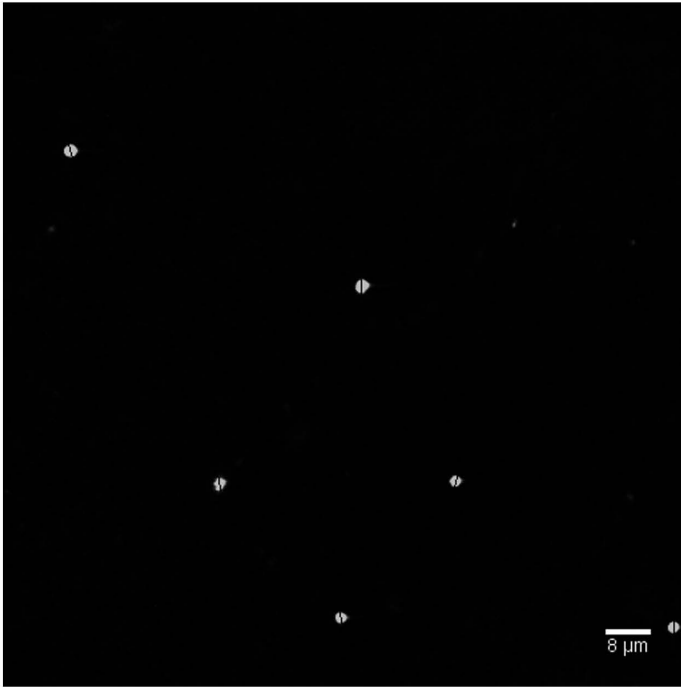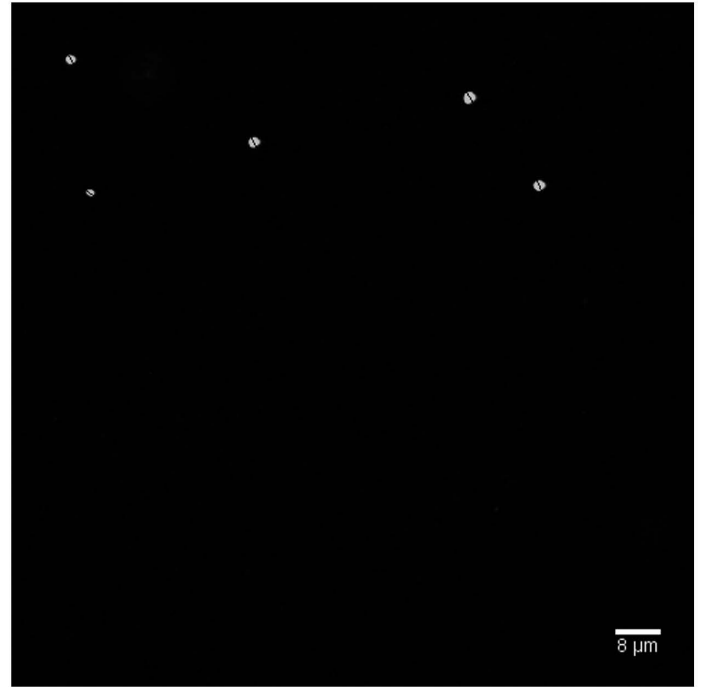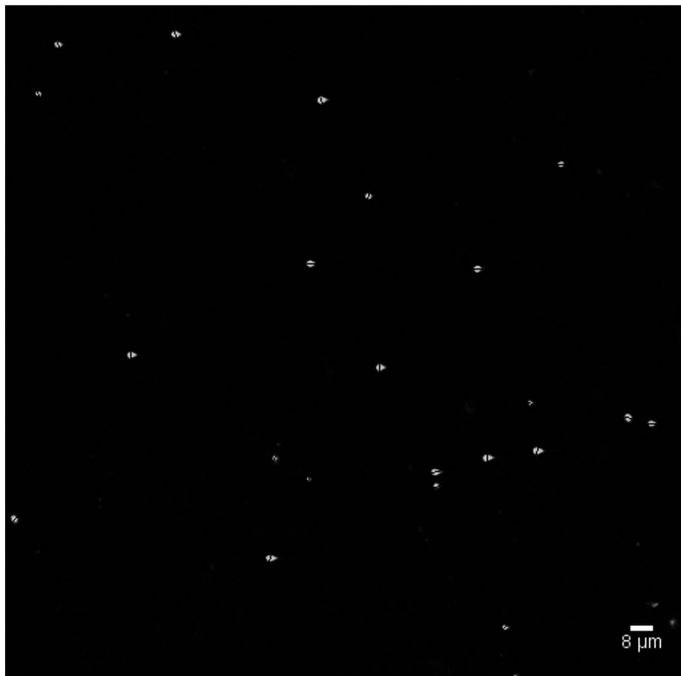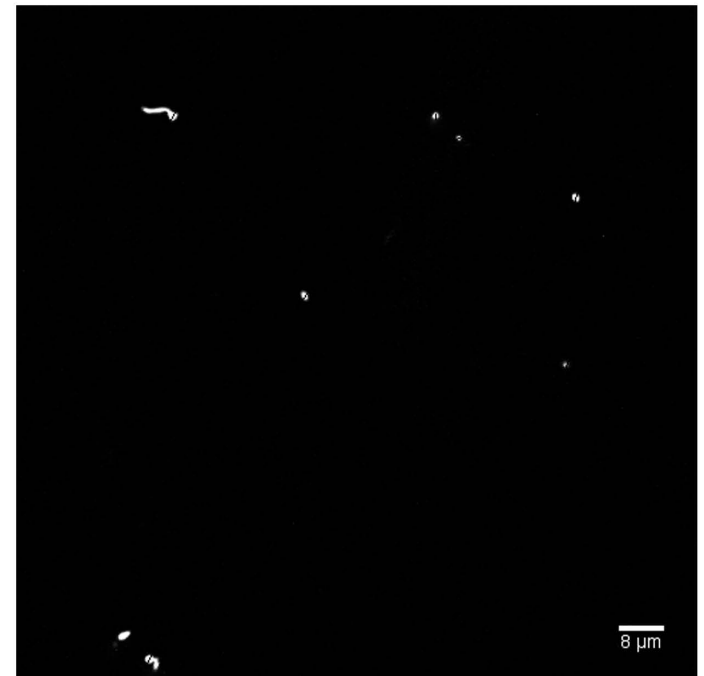

**Fig. S1. MASTER IMAGES USED TO QUANTIFY SPORE DIAMETER**

*Streptomyces coelicolor* 5-hours. Spore diameters measured are labelled by lines.

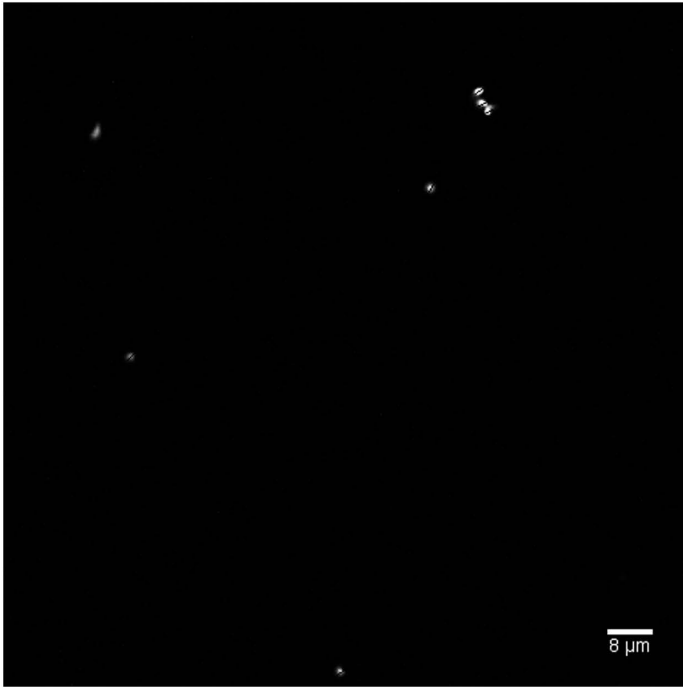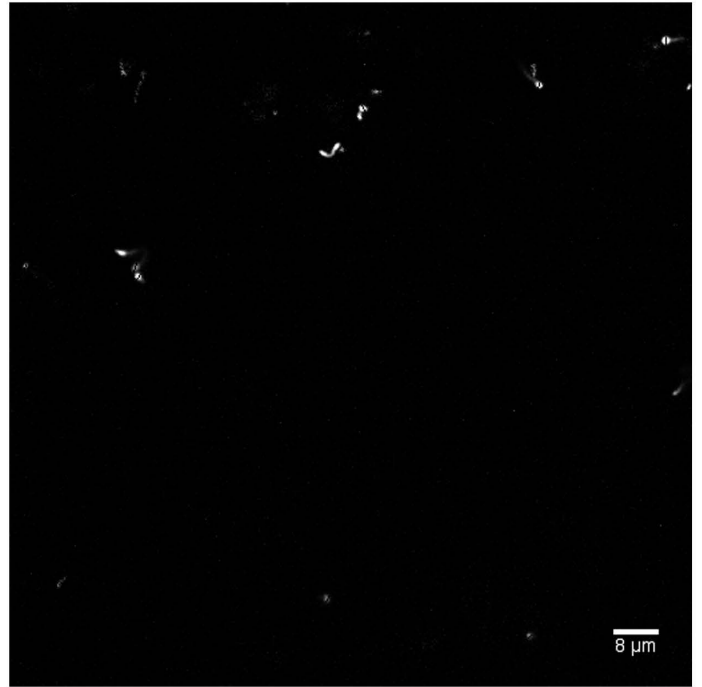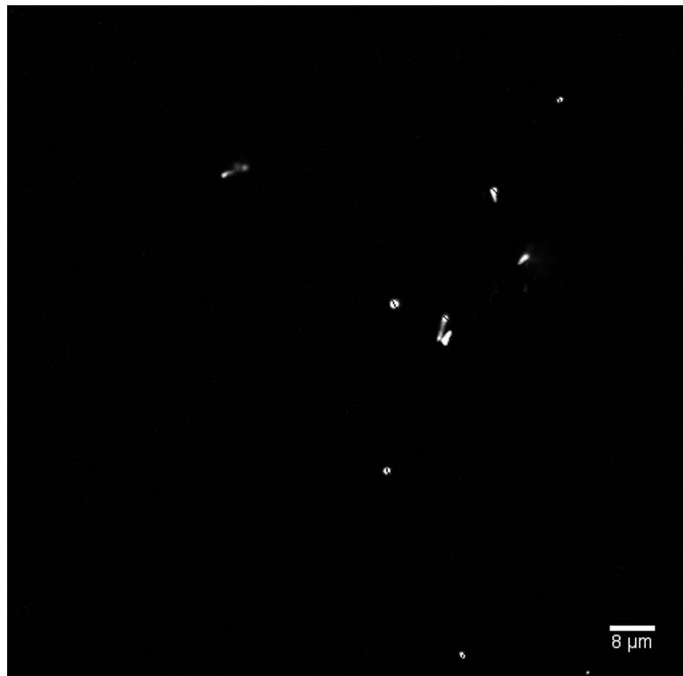

**Fig. S1. MASTER IMAGES USED TO QUANTIFY SPORE DIAMETER**

*Streptomyces coelicolor* wild type. 8-hours. Spore diameters measured are labelled by lines.

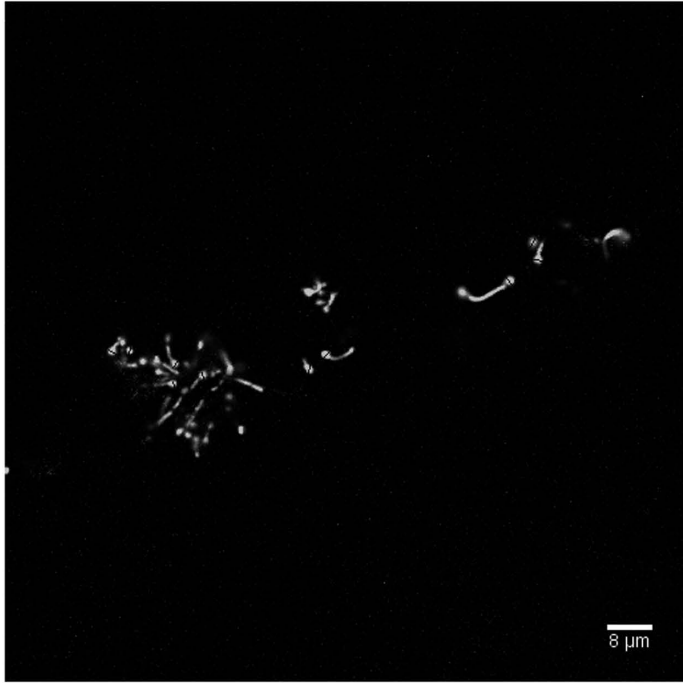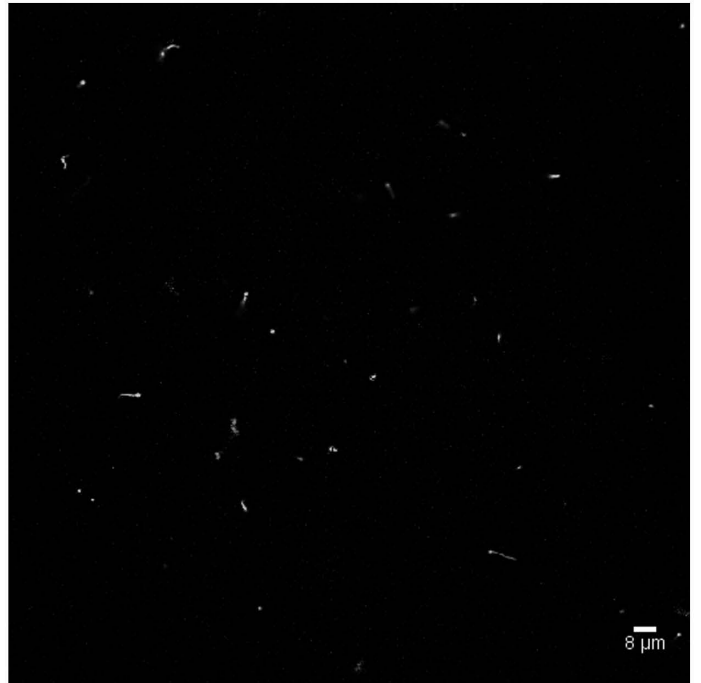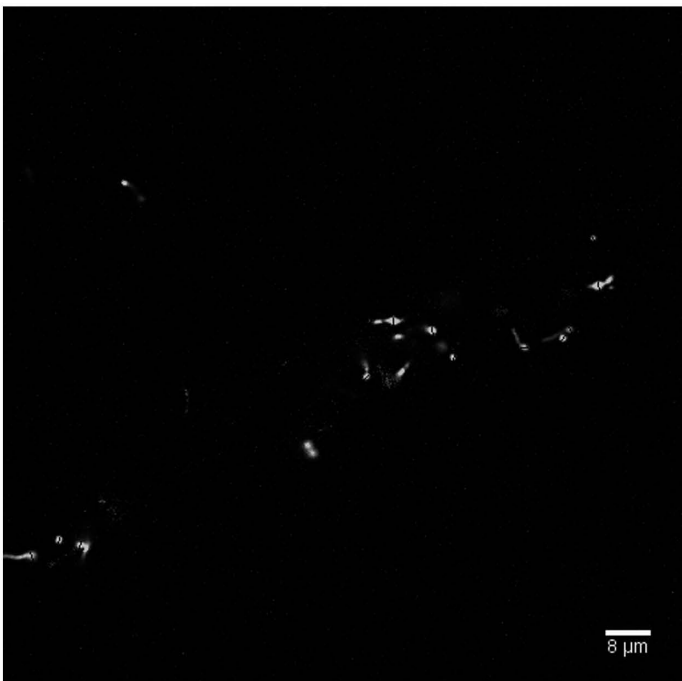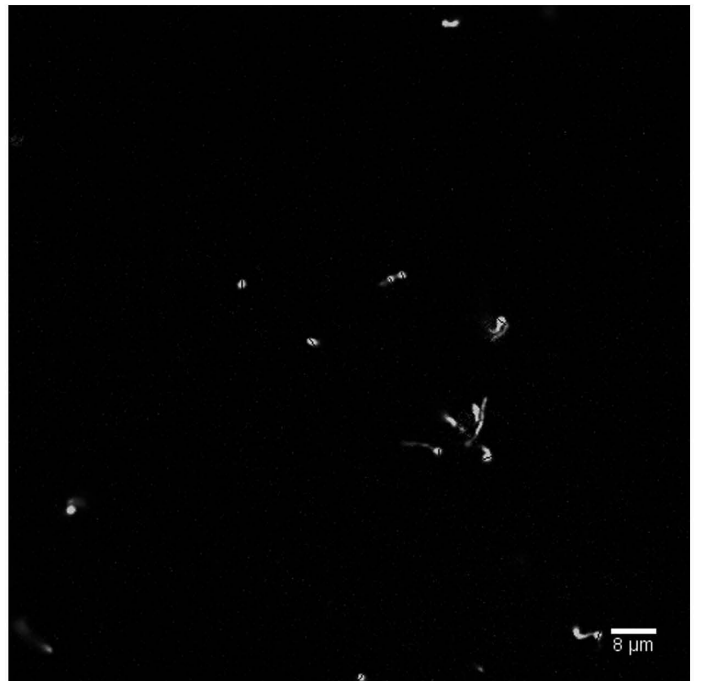

**Fig. S1. MASTER IMAGES USED TO QUANTIFY SPORE DIAMETER**

*Streptomyces coelicolor* wild type. 8-hours. Spore diameters measured are labelled by lines.

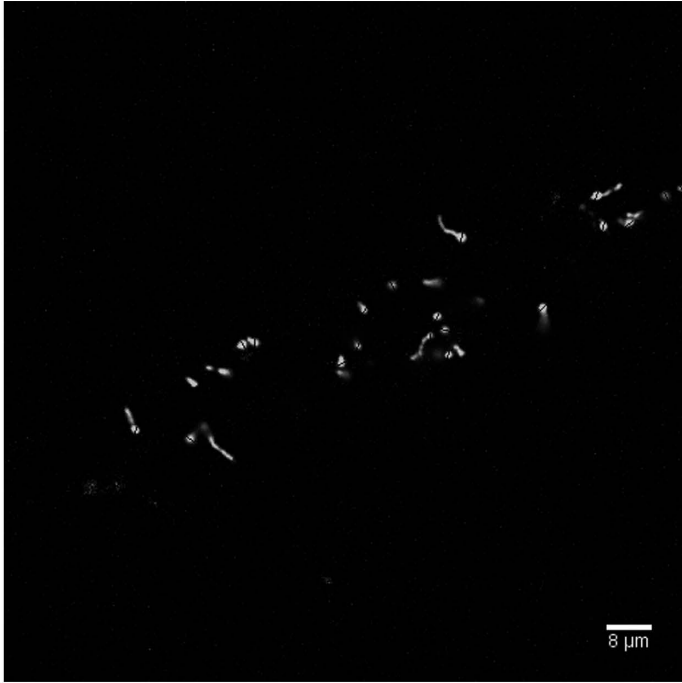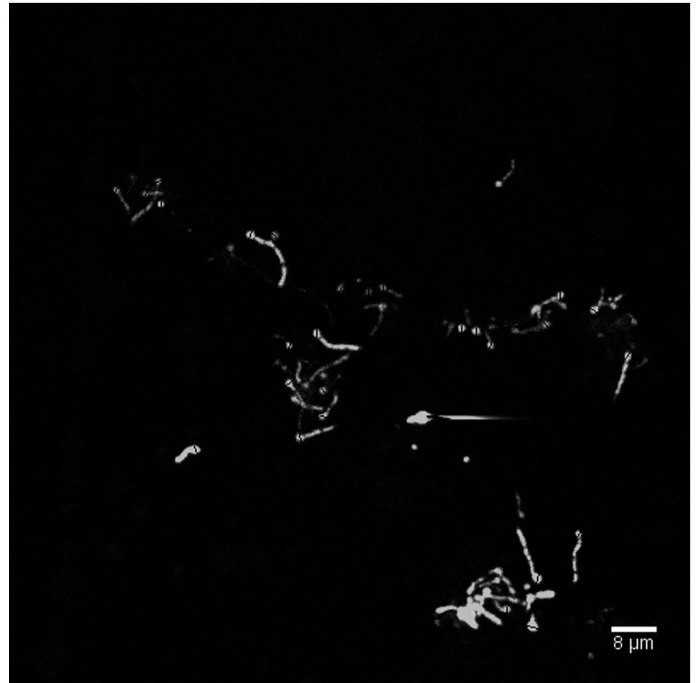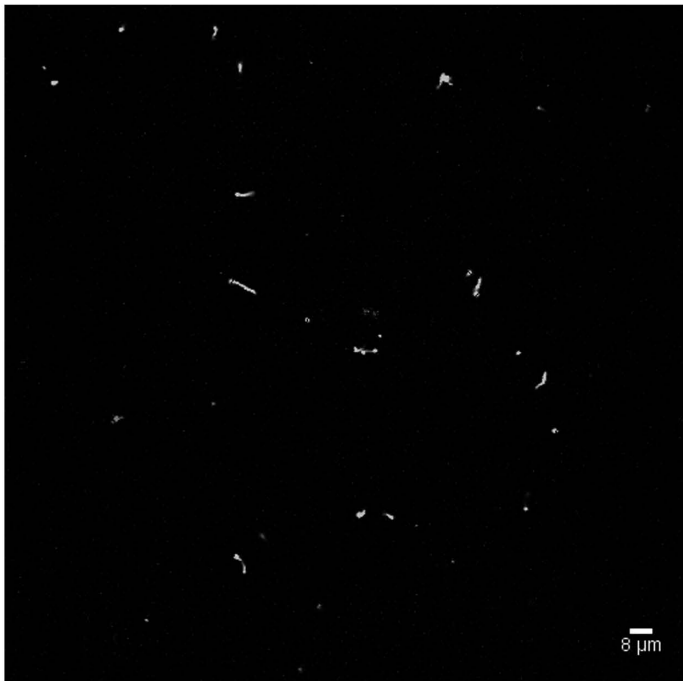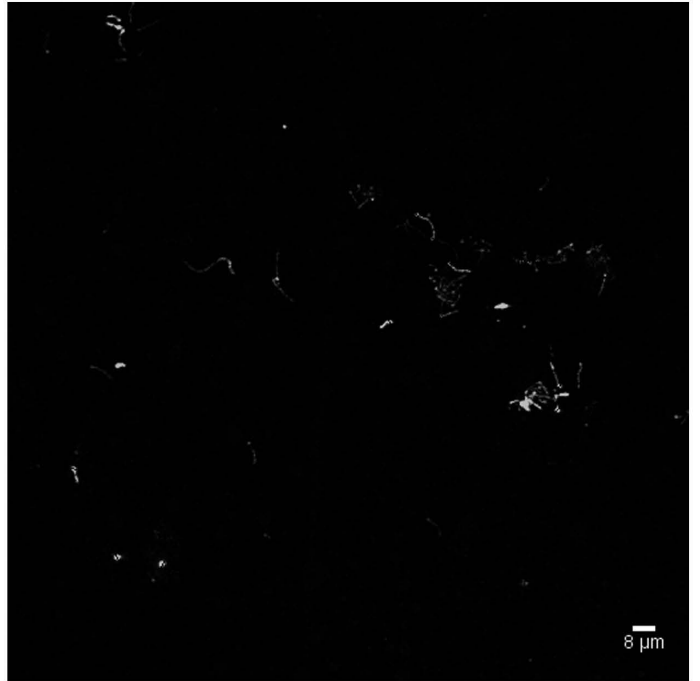

**Fig. S1. MASTER IMAGES USED TO QUANTIFY SPORE DIAMETER**

*Streptomyces coelicolor* wild type. 15-hours. Spore diameters measured are labelled by lines.

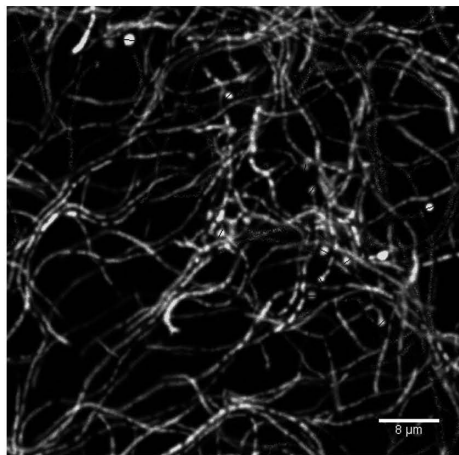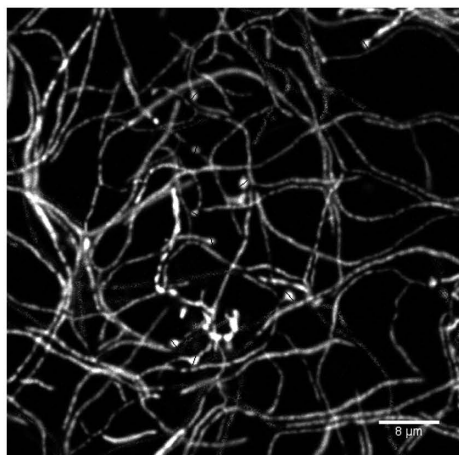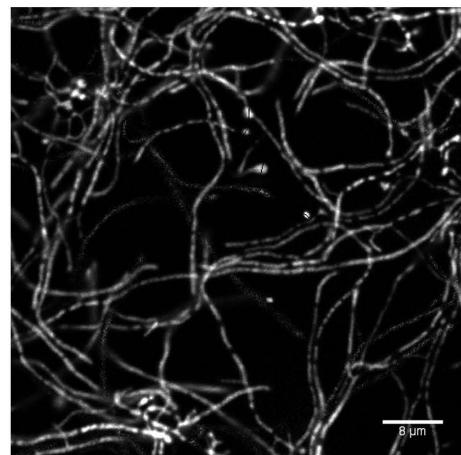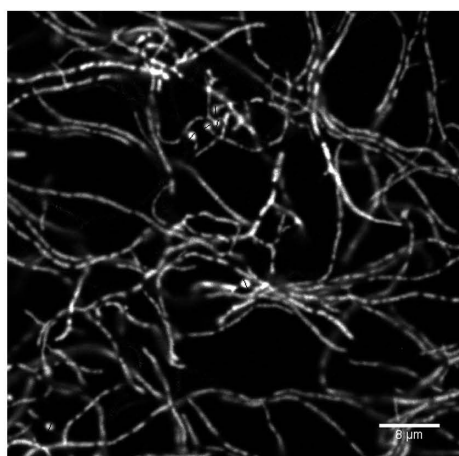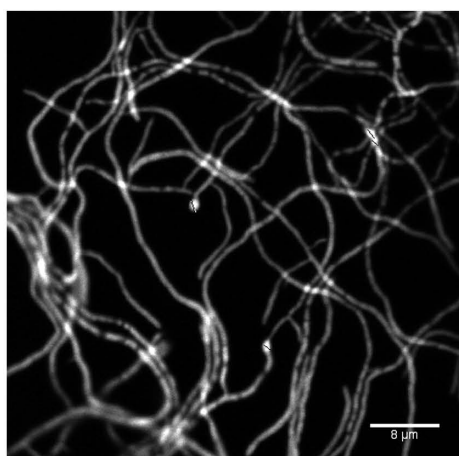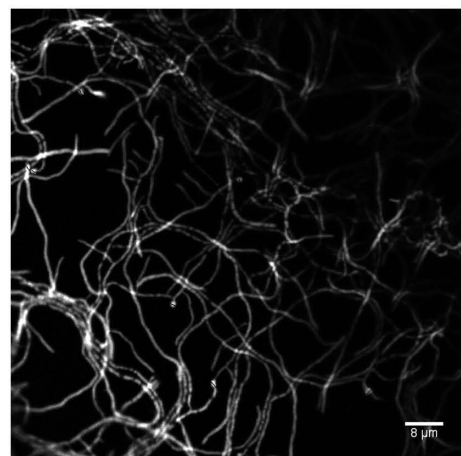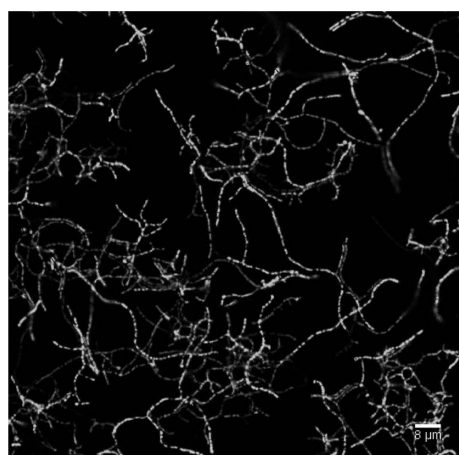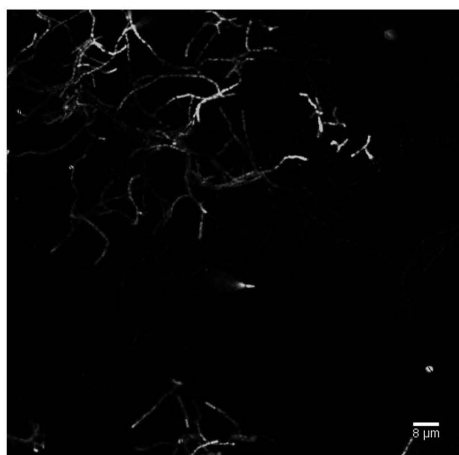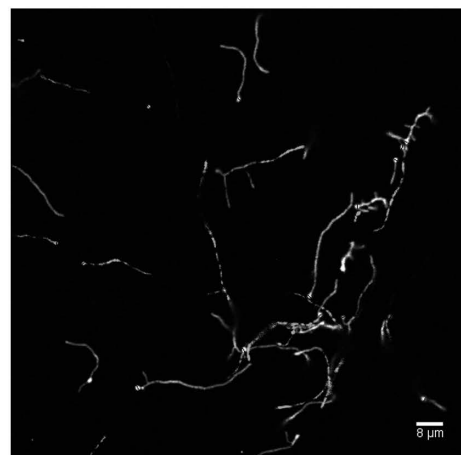

## Fig. S1. MASTER IMAGES USED TO QUANTIFY SPORE DIAMETER

*Streptomyces coelicolor* wild type. 15-hours. Spore diameters measured are labelled by lines.

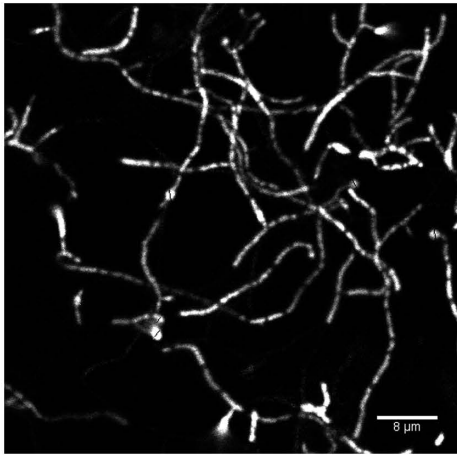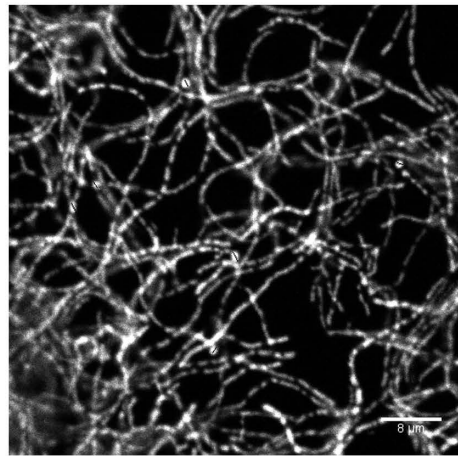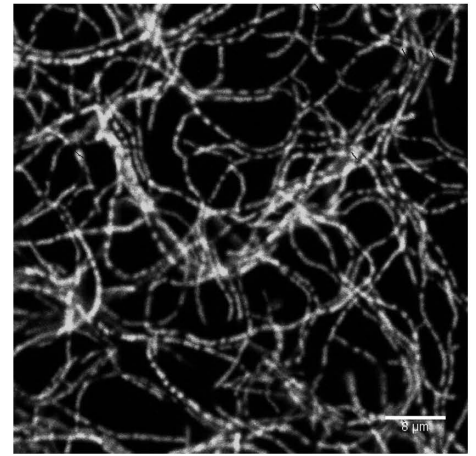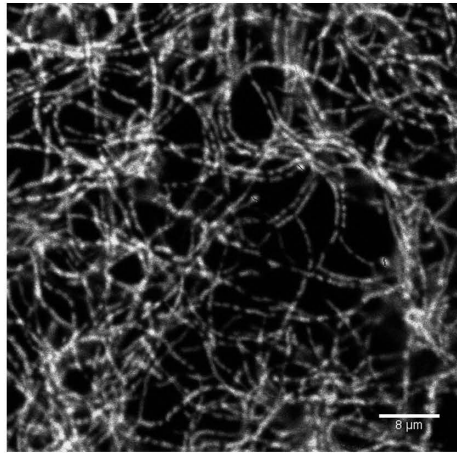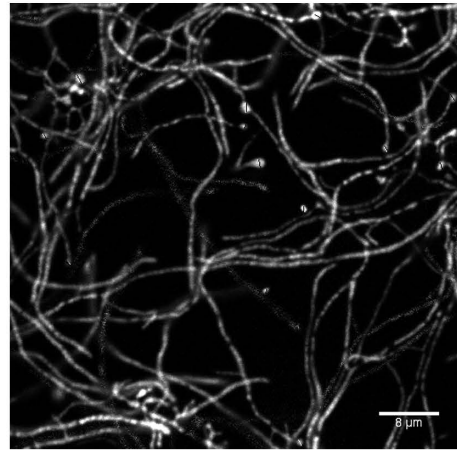



**Fig. S1. MASTER IMAGES USED TO QUANTIFY SPORE DIAMETER**

*Streptomyces coelicolor*::Tn5062 5-hours. Spore diameters measured are labelled by lines.

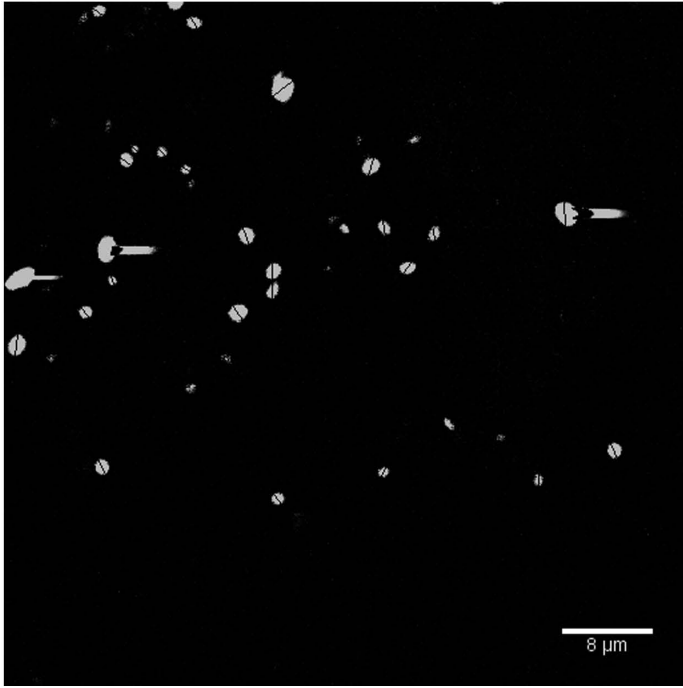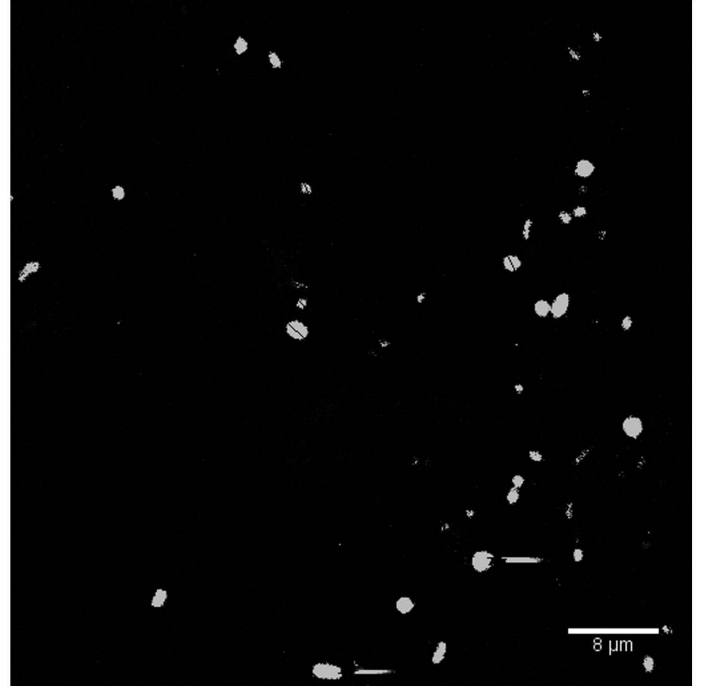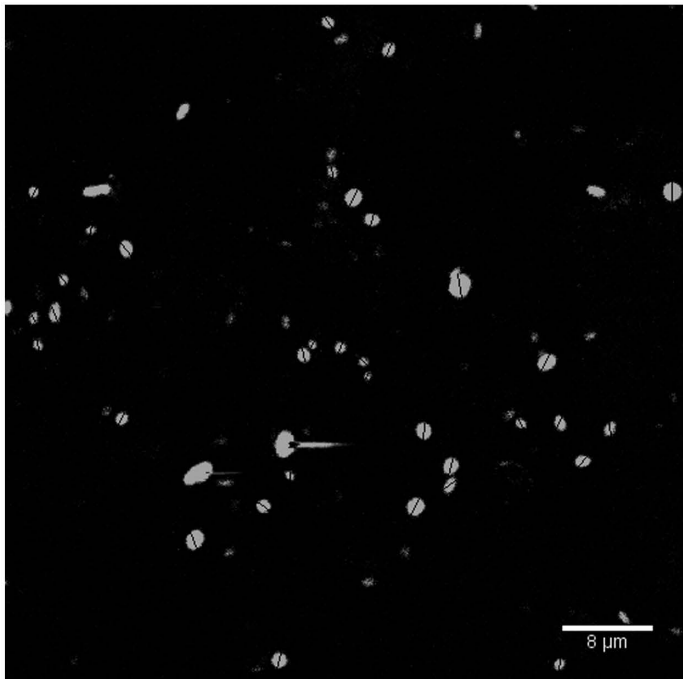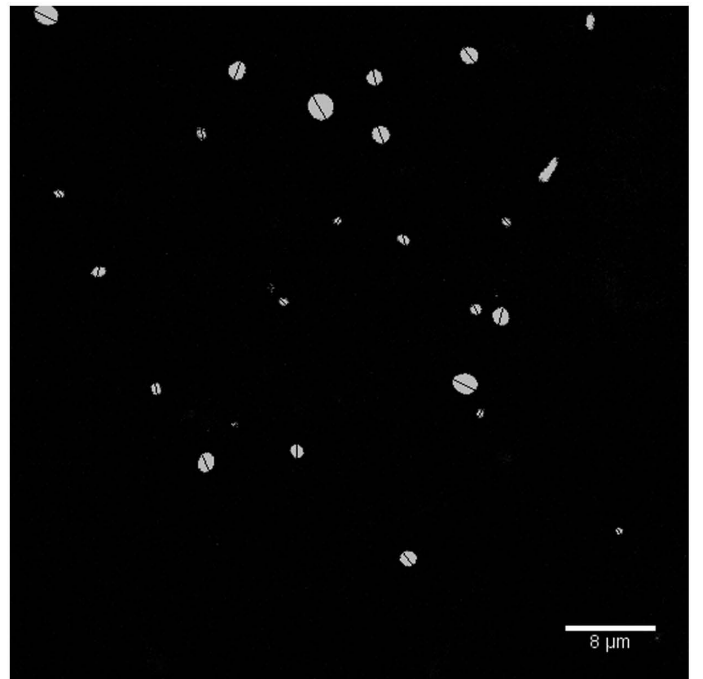

**Fig. S1. MASTER IMAGES USED TO QUANTIFY SPORE DIAMETER**

*Streptomyces coelicolor*::Tn5062 5-hours. Spore diameters measured are labelled by lines.

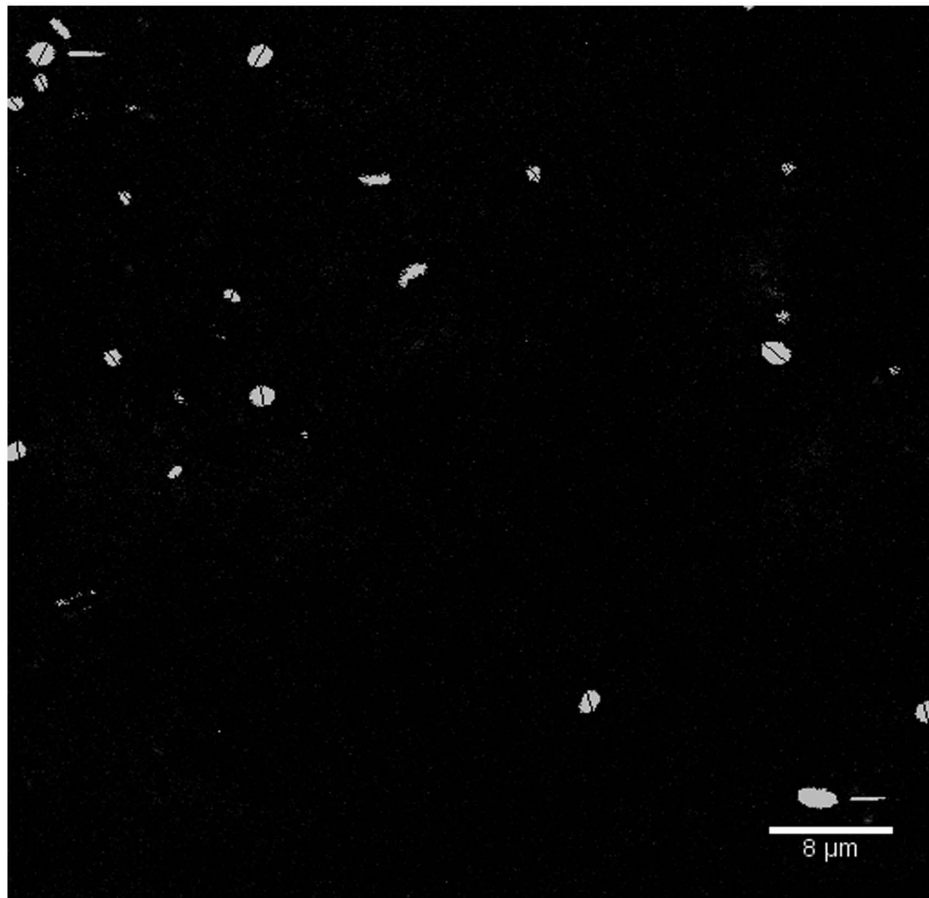

**Fig. S1. MASTER IMAGES USED TO QUANTIFY SPORE DIAMETER**

*Streptomyces coelicolor*::Tn5062 8-hours. Spore diameters measured are labelled by lines.

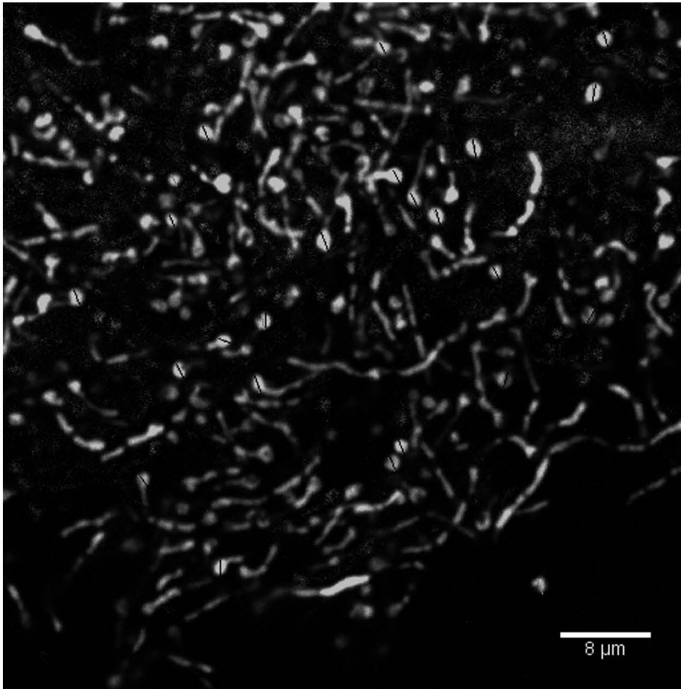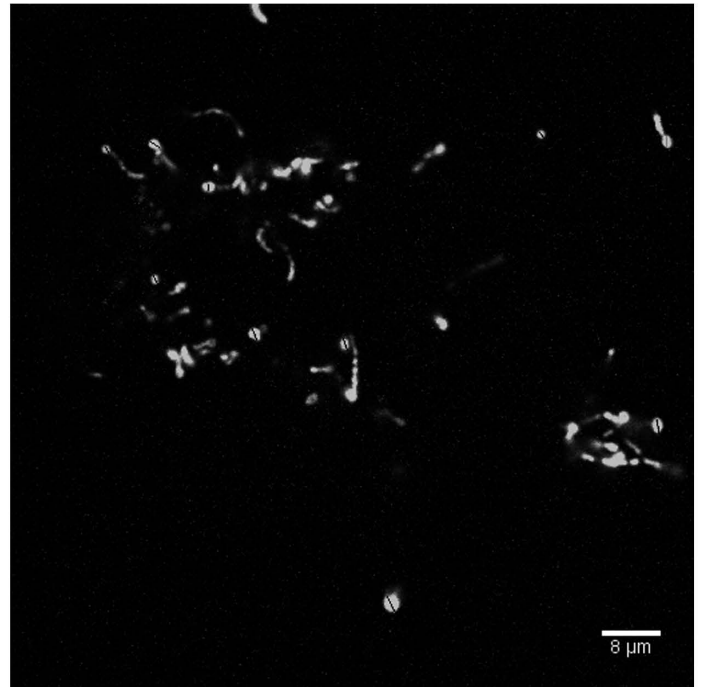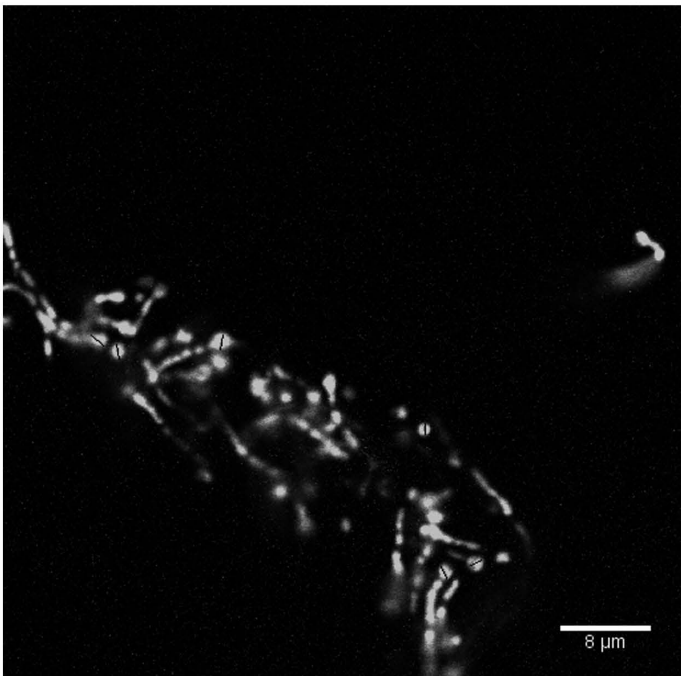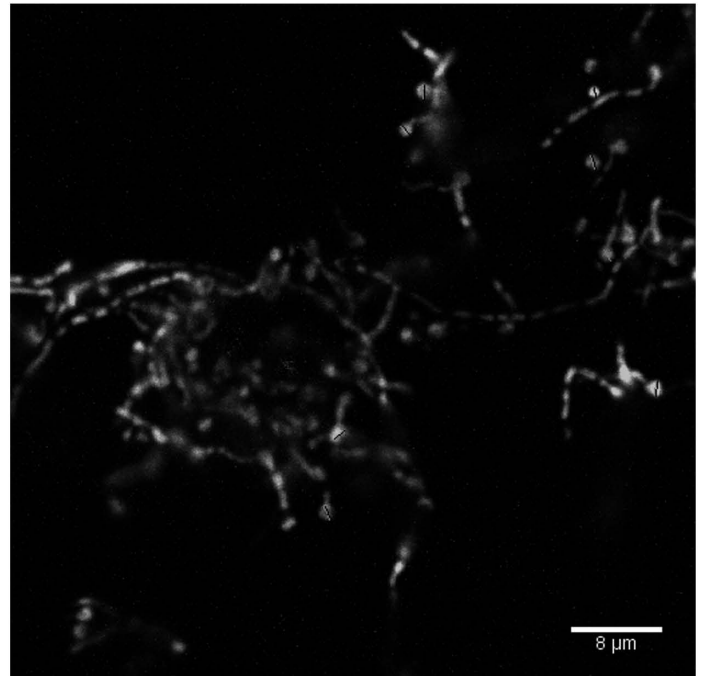

**Fig. S1. MASTER IMAGES USED TO QUANTIFY SPORE DIAMETER**

*Streptomyces coelicolor*::Tn5062 8-hours. Spore diameters measured are labelled by lines.

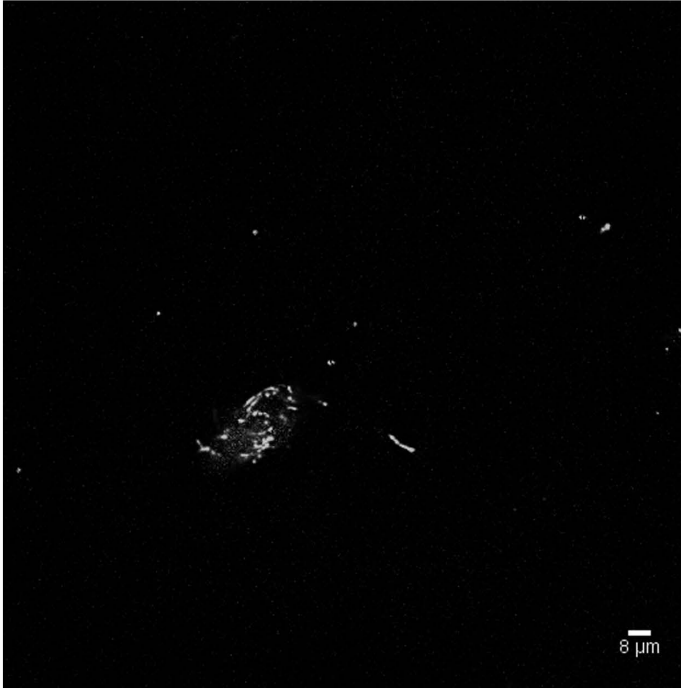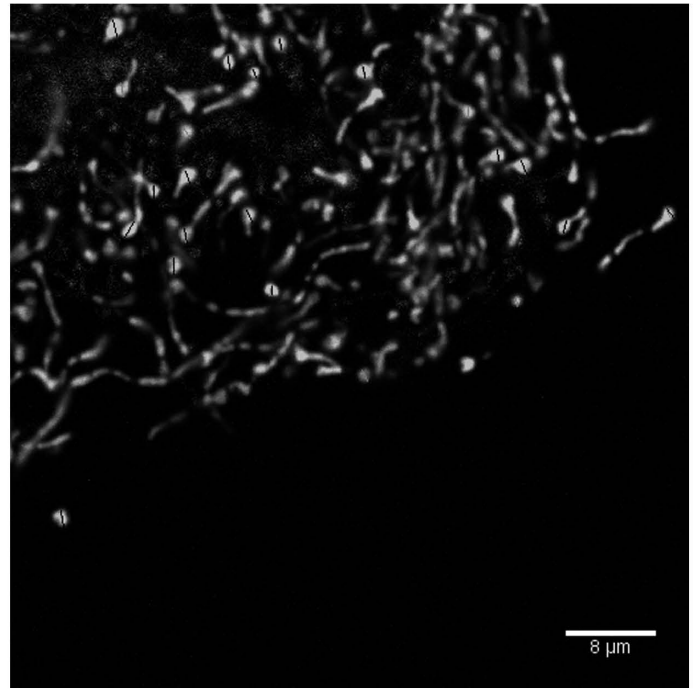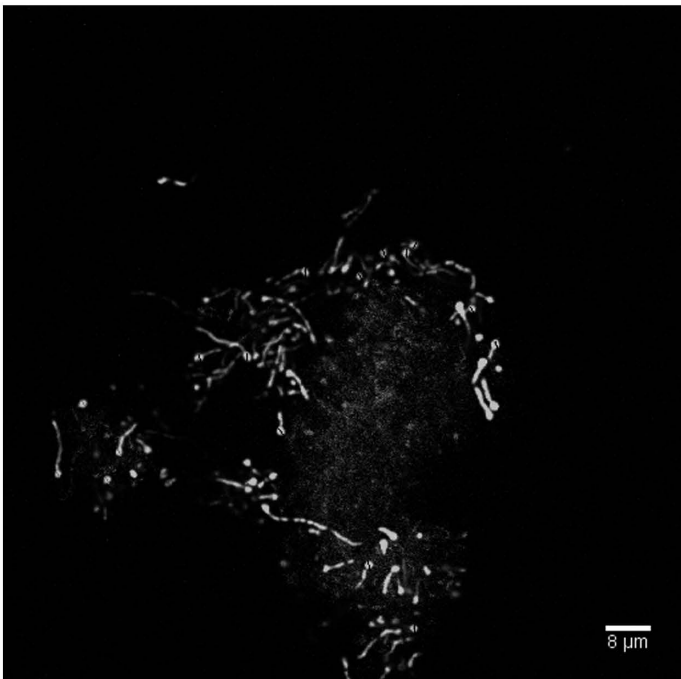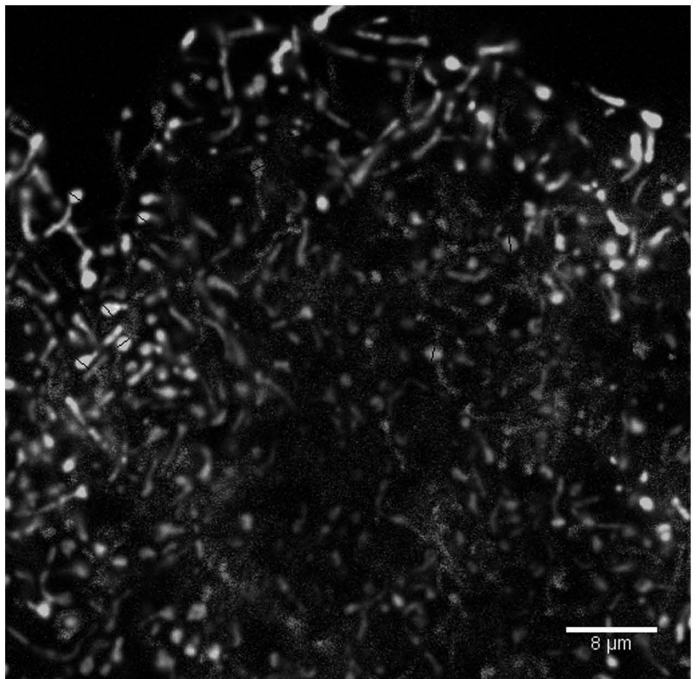

**Fig. S1. MASTER IMAGES USED TO QUANTIFY SPORE DIAMETER**

*Streptomyces coelicolor* SCO4439::Tn5062. 15-hours. Spore diameters measured are labelled by lines.

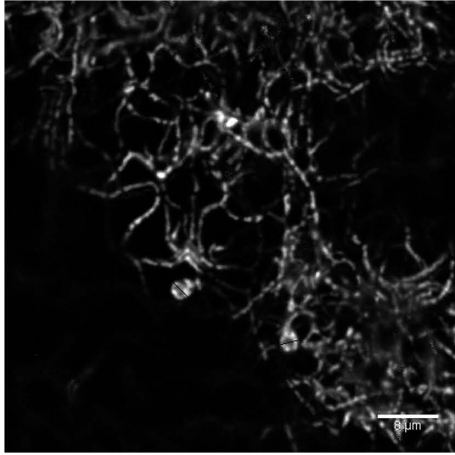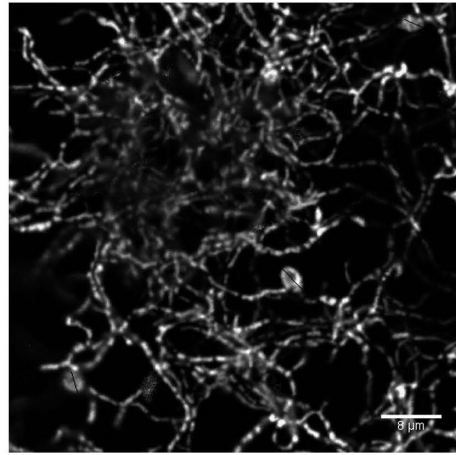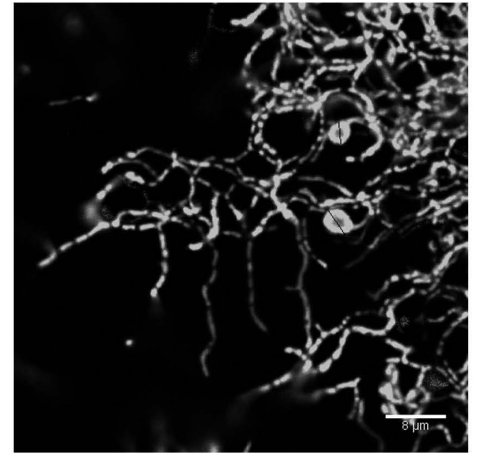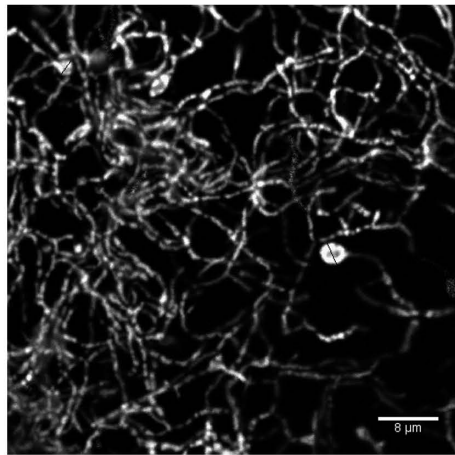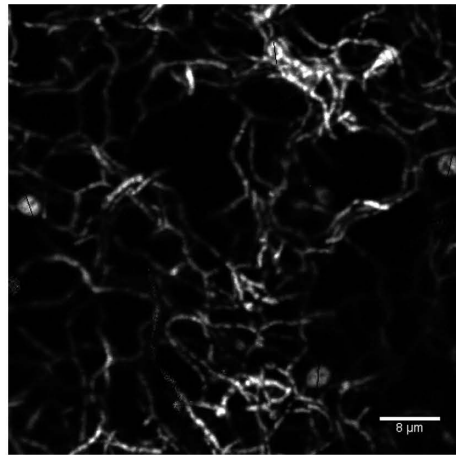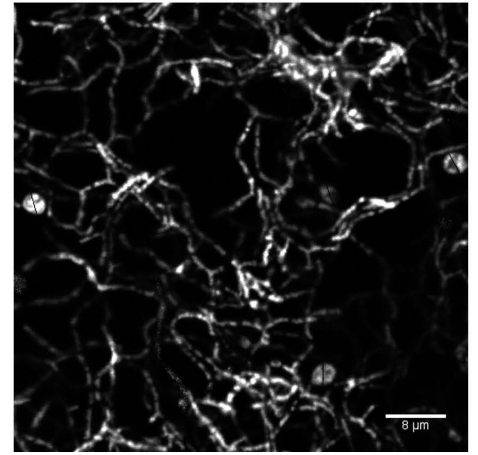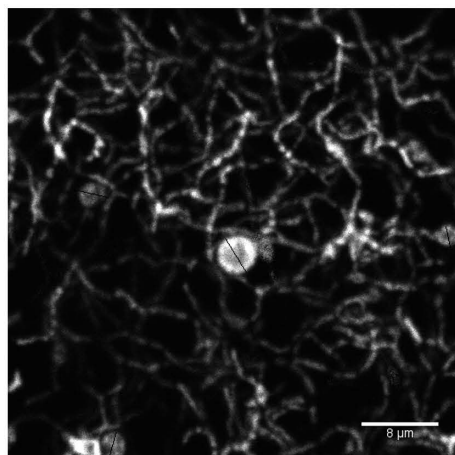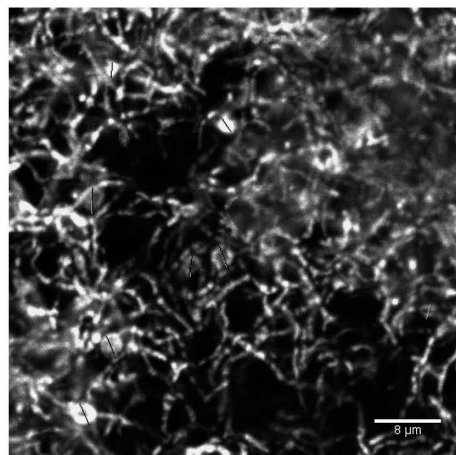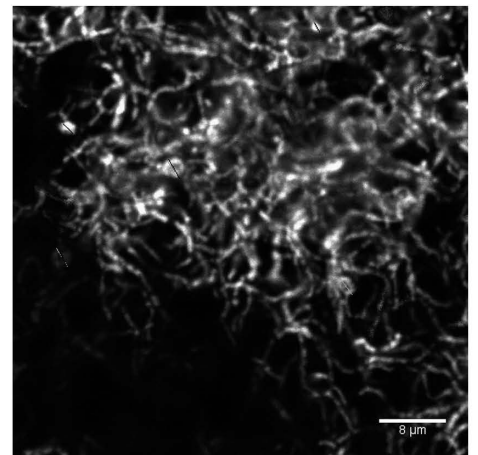

**Fig. S1. MASTER IMAGES USED TO QUANTIFY SPORE DIAMETER**

*Streptomyces coelicolor* SCO4439::Tn5062. 15-hours. Spore diameters measured are labelled by lines.

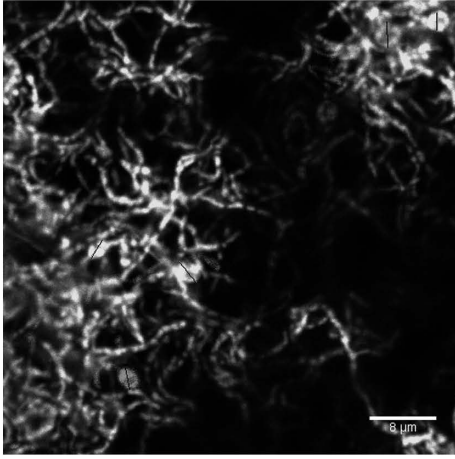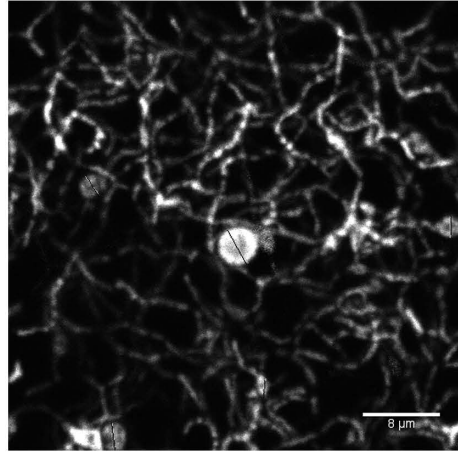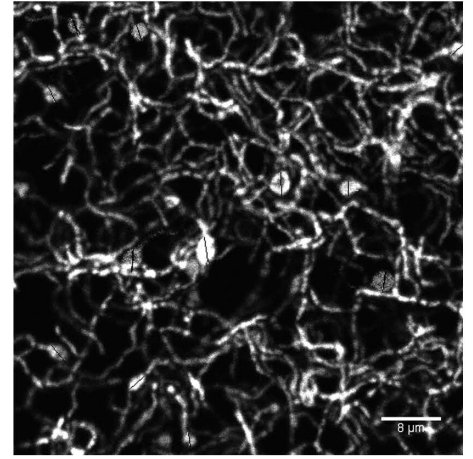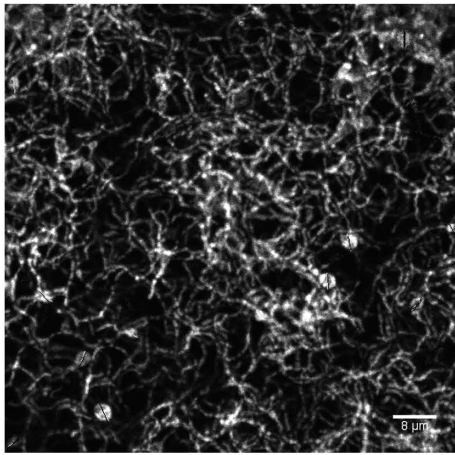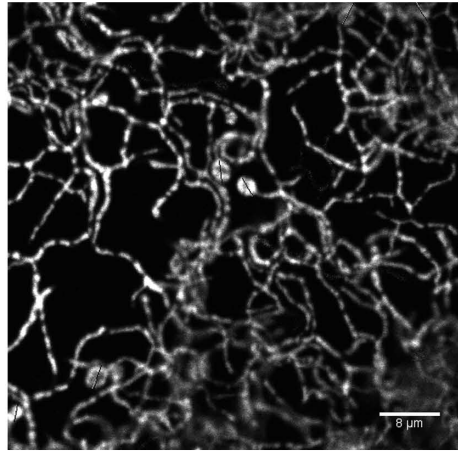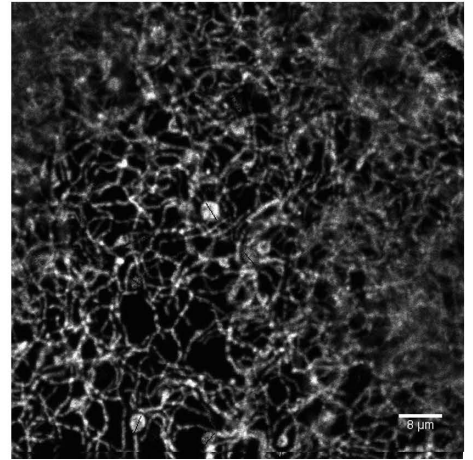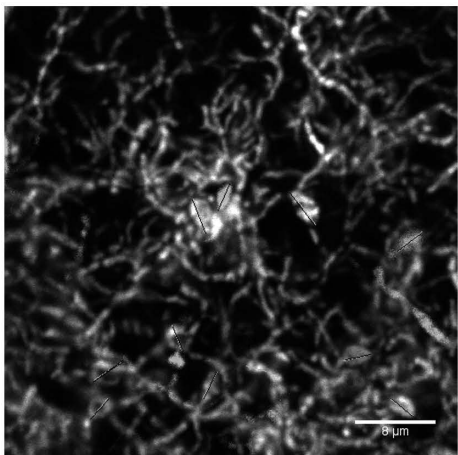

**Fig. S1. MASTER IMAGES USED TO QUANTIFY SPORE DIAMETER**

*Streptomyces coelicolor*::Tn5062[pBR3\*] 5-hours. Spore diameters measured are labelled by lines.

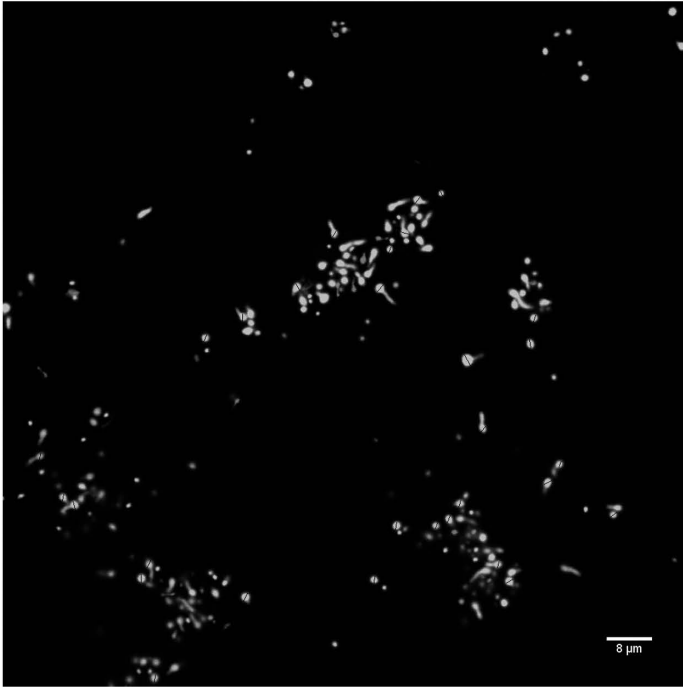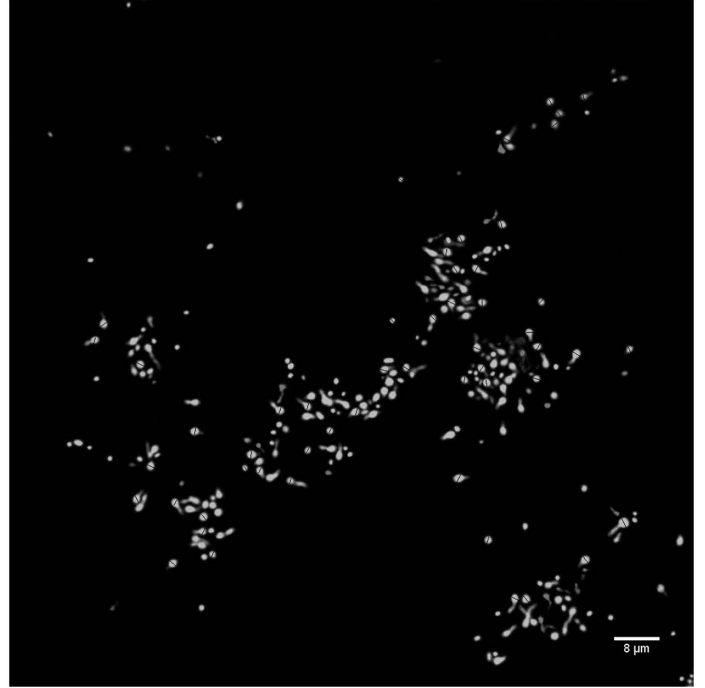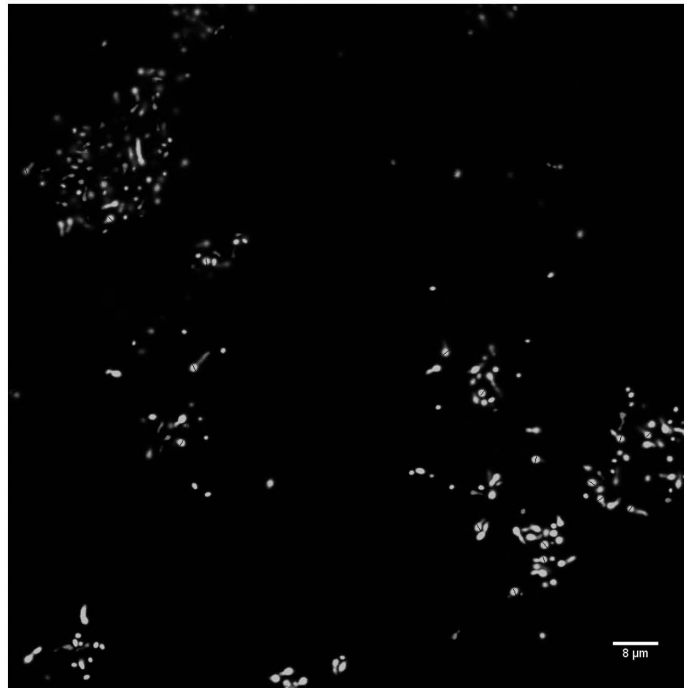

**Fig. S1. MASTER IMAGES USED TO QUANTIFY SPORE DIAMETER**

*Streptomyces coelicolor*::Tn5062[pBR3\*] 8-hours. Spore diameters measured are labelled by lines.

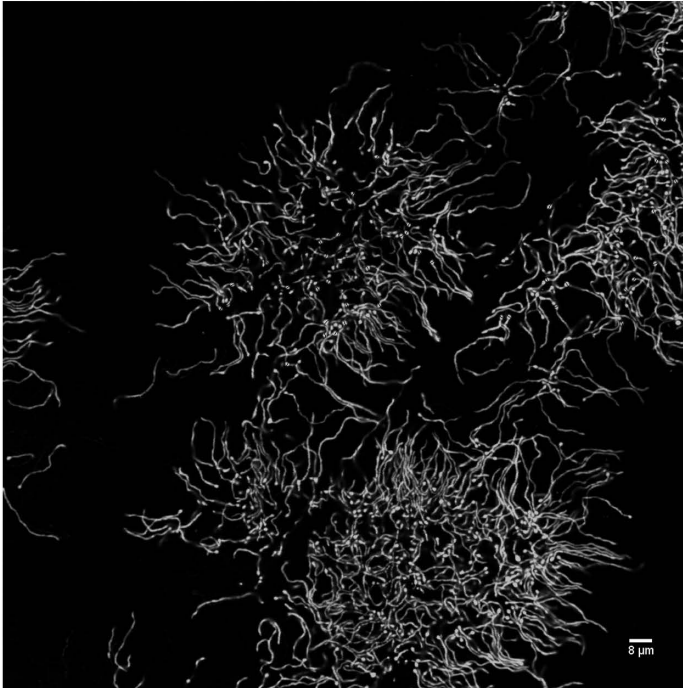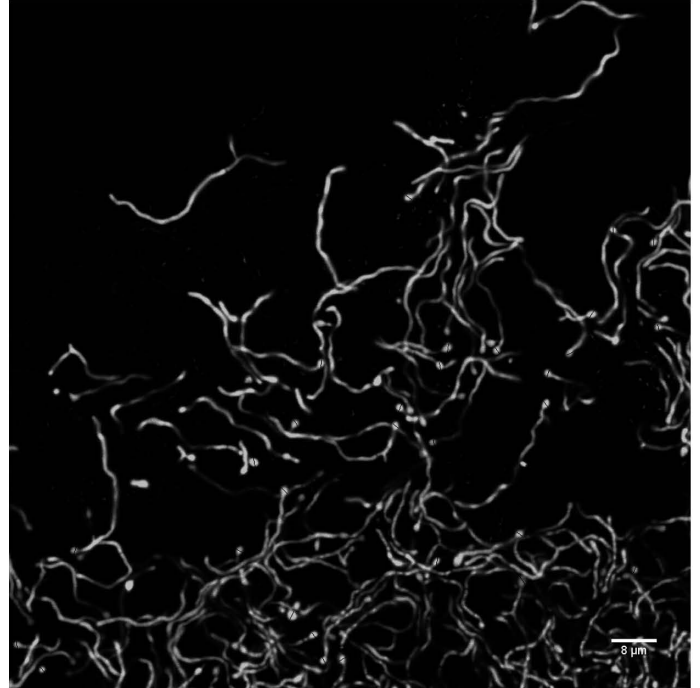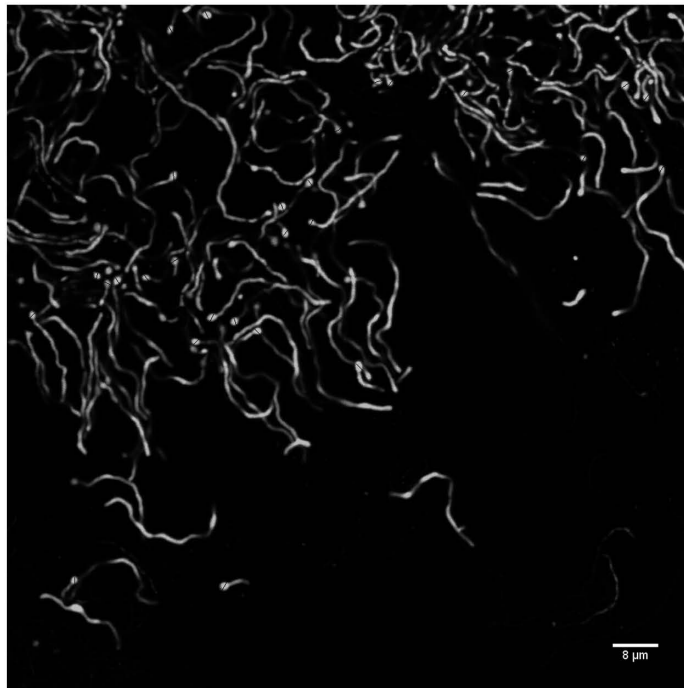



**Fig. S1. MASTER IMAGES USED TO QUANTIFY SPORE DIAMETER**

*Streptomyces coelicolor*:Tn5062[pBR3\*] 15-hours. Spore diameters measured are labelled by lines.

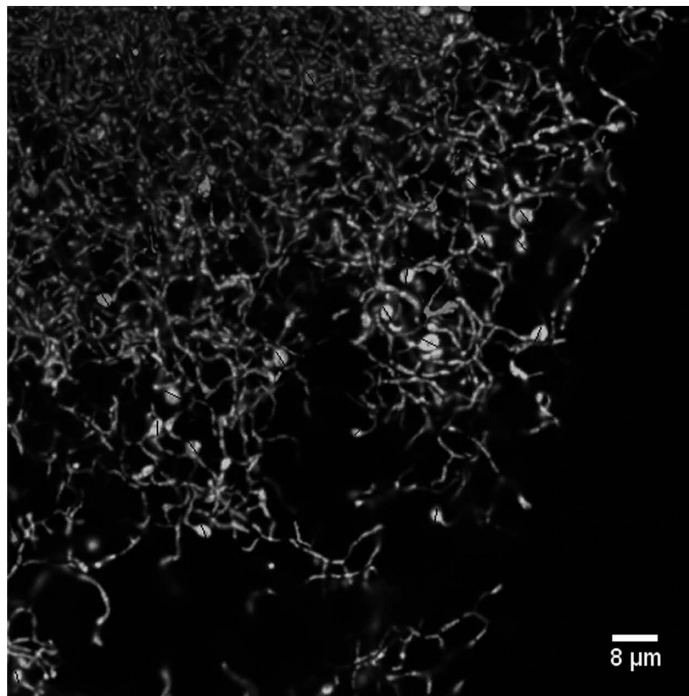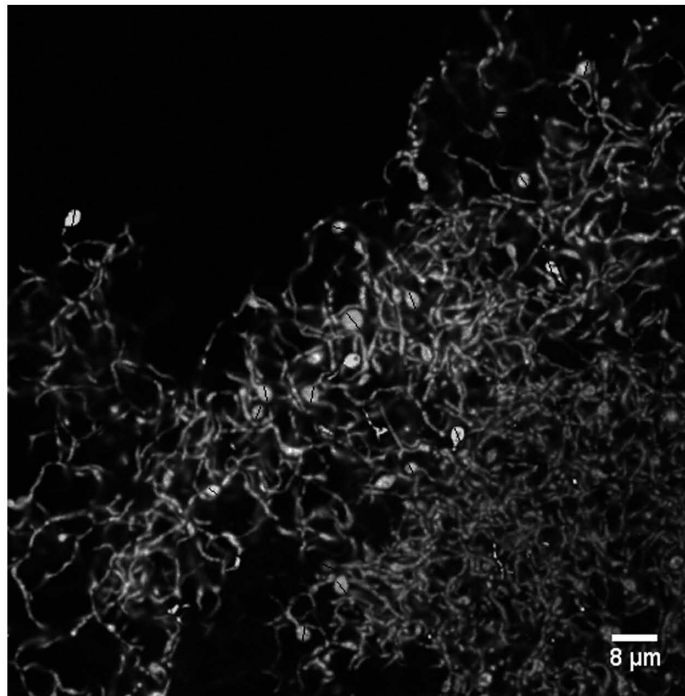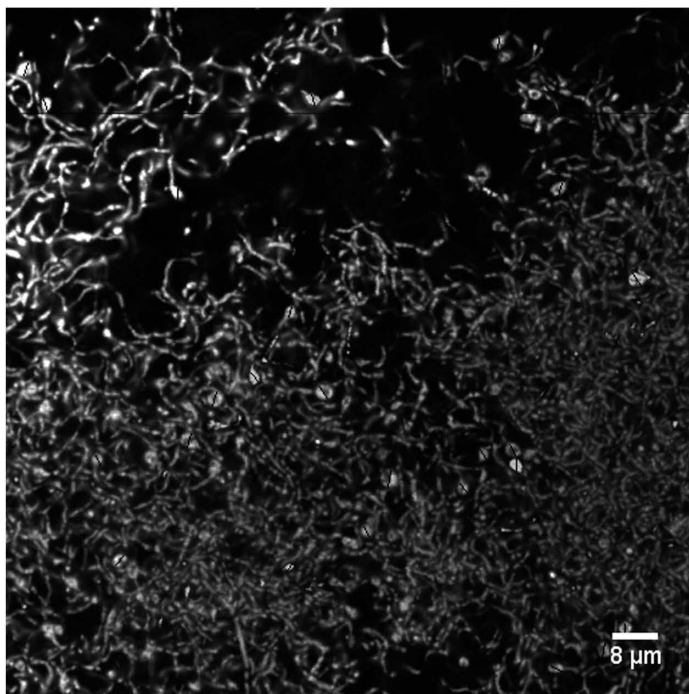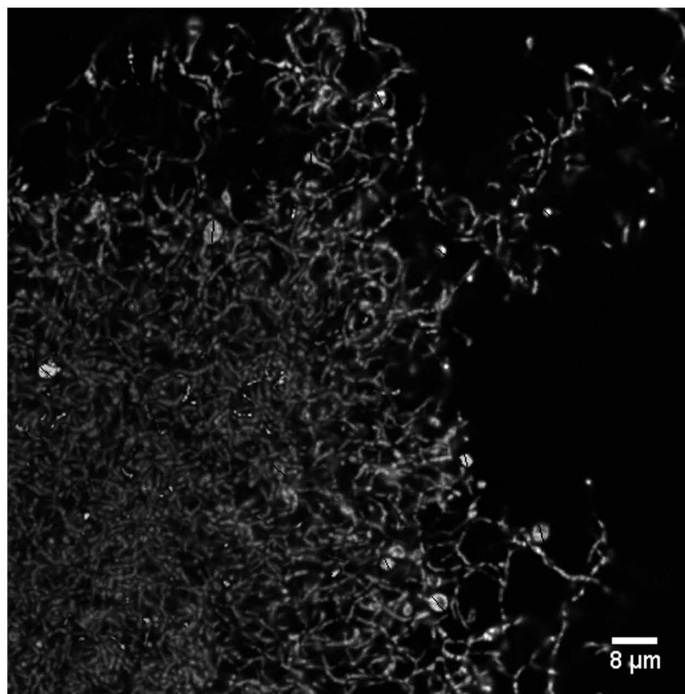

**Fig. S1. MASTER IMAGES USED TO QUANTIFY SPORE DIAMETER**

*Streptomyces coelicolor*::Tn5062[pBR3\*] 15-hours. Spore diameters measured are labelled by lines.

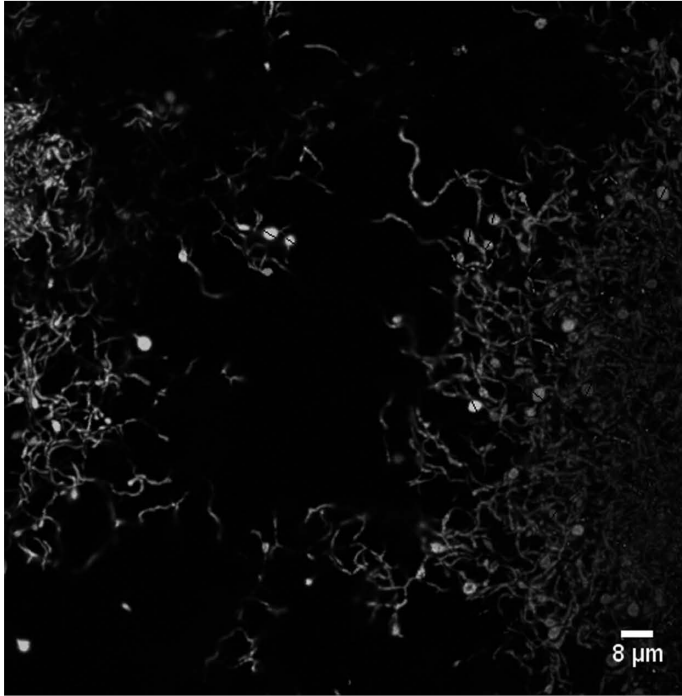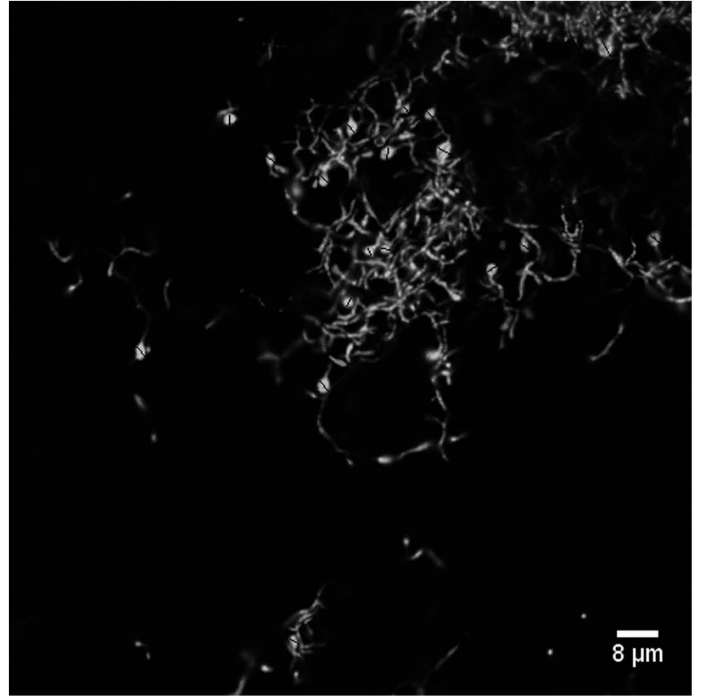

**Fig. S2. MASTER IMAGES USED TO QUANTIFY SPORE DIAMETER**

*Streptomyces coelicolor* [pMS82]. 15-hours. Spore diameters measured are labelled by lines.

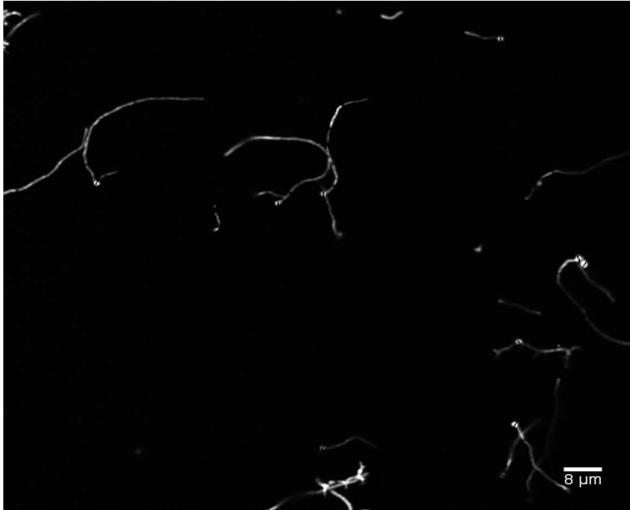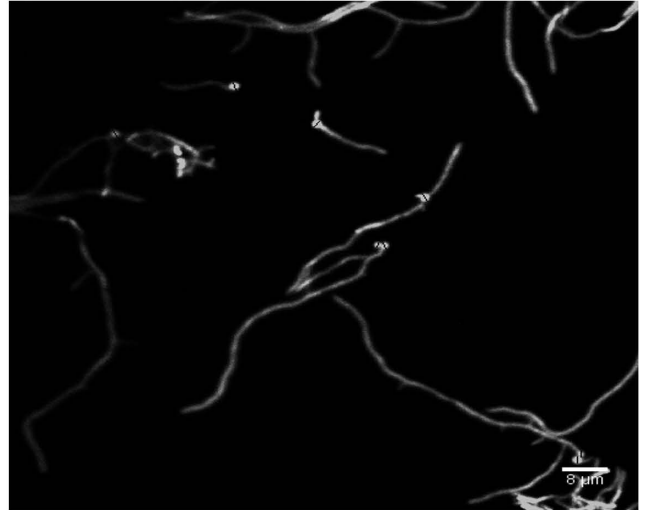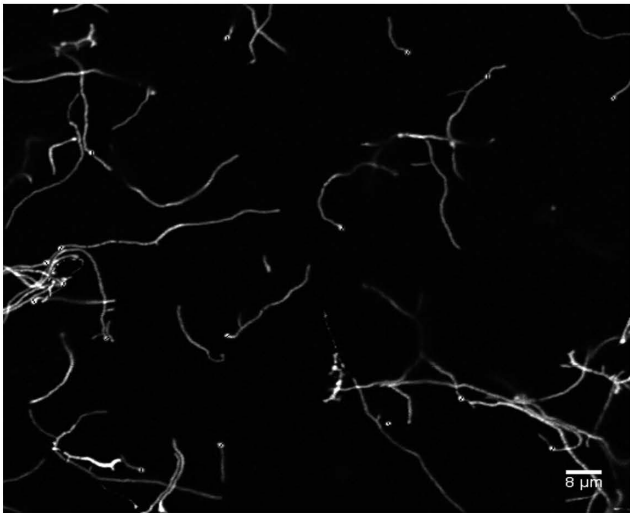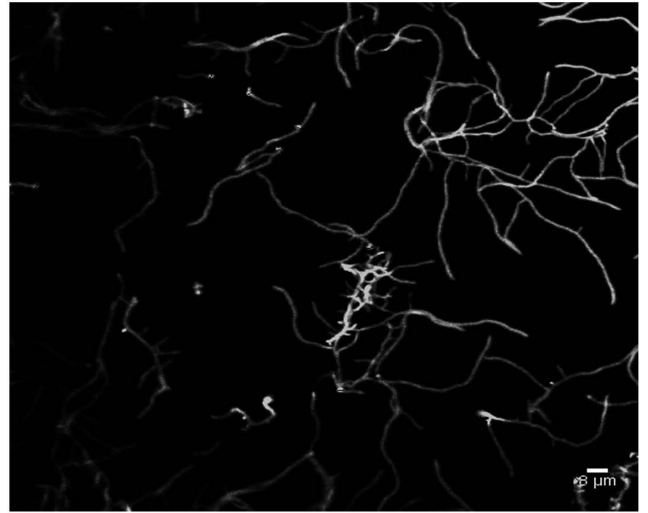

**Fig. S2. MASTER IMAGES USED TO QUANTIFY SPORE DIAMETER**

*Streptomyces coelicolor* [pMS82]. 15-hours. Spore diameters measured are labelled by lines.

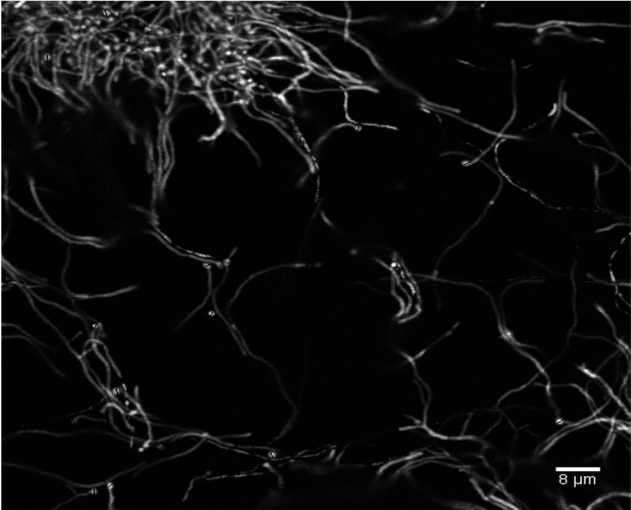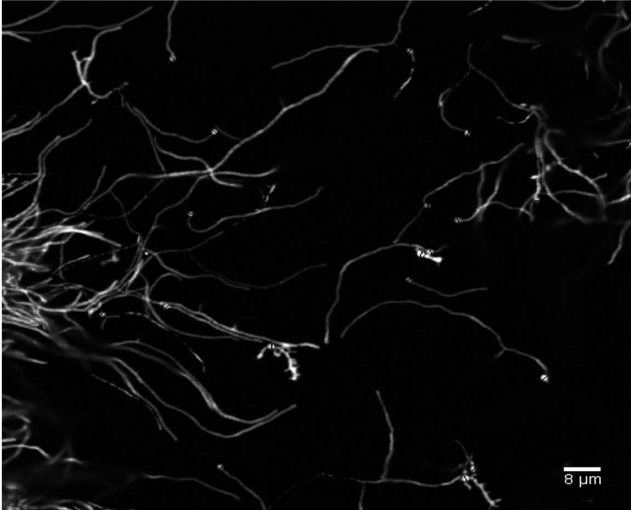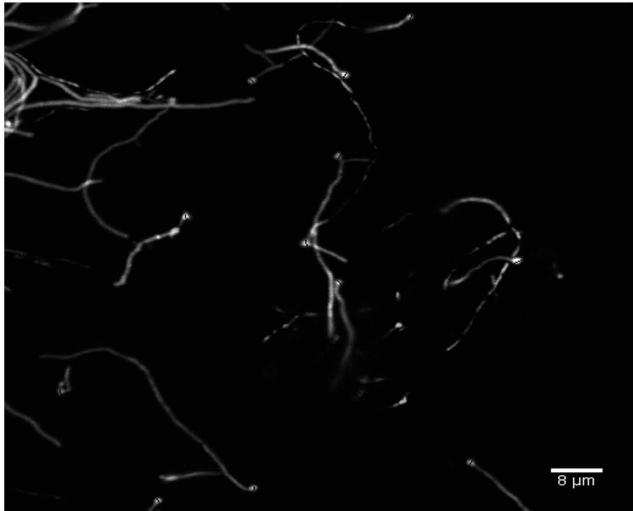

**Fig. S2. MASTER IMAGES USED TO QUANTIFY SPORE DIAMETER**

SCO4439::Tn5062 [pBRB3]. 15-hours. Spore diameters measured are labelled by lines.

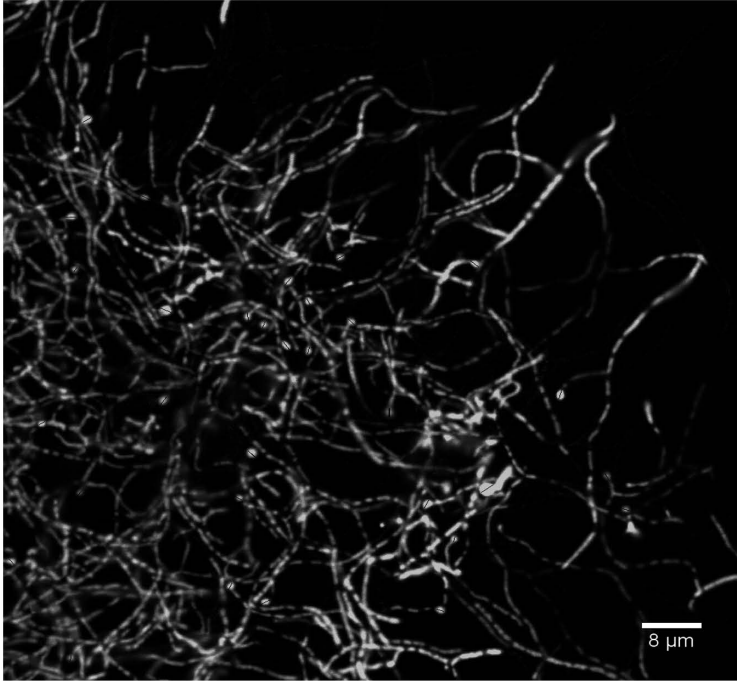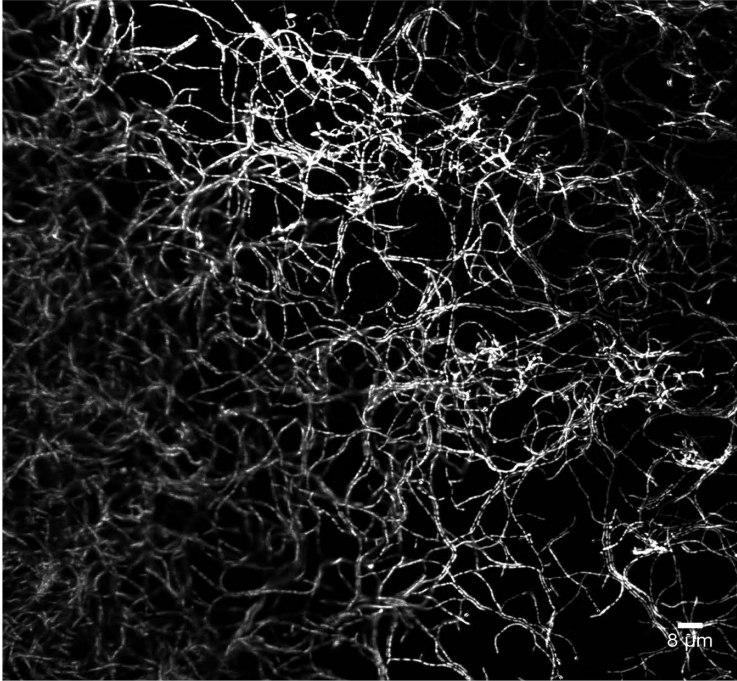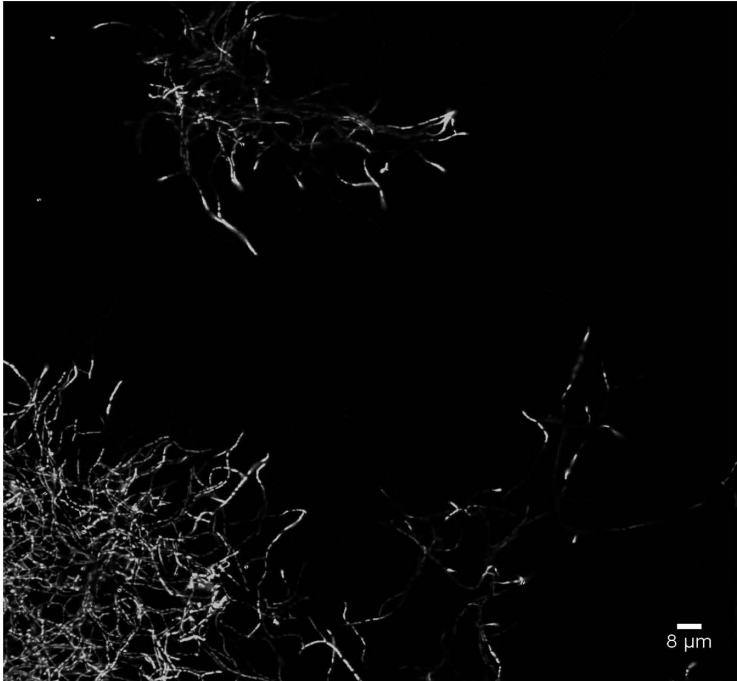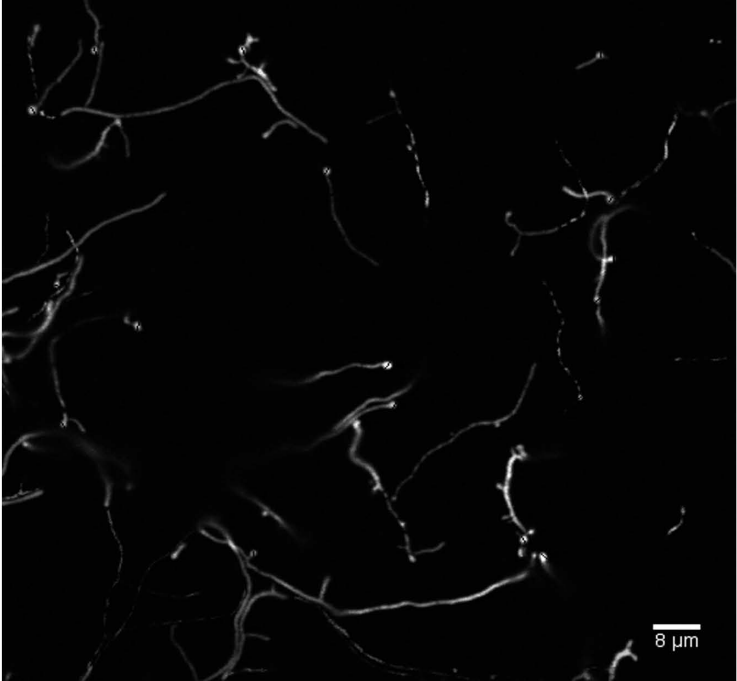

**Fig. S2. MASTER IMAGES USED TO QUANTIFY SPORE DIAMETER**

SCO4439::Tn5062 [pBRB3]. 15-hours. Spore diameters measured are labelled by lines.

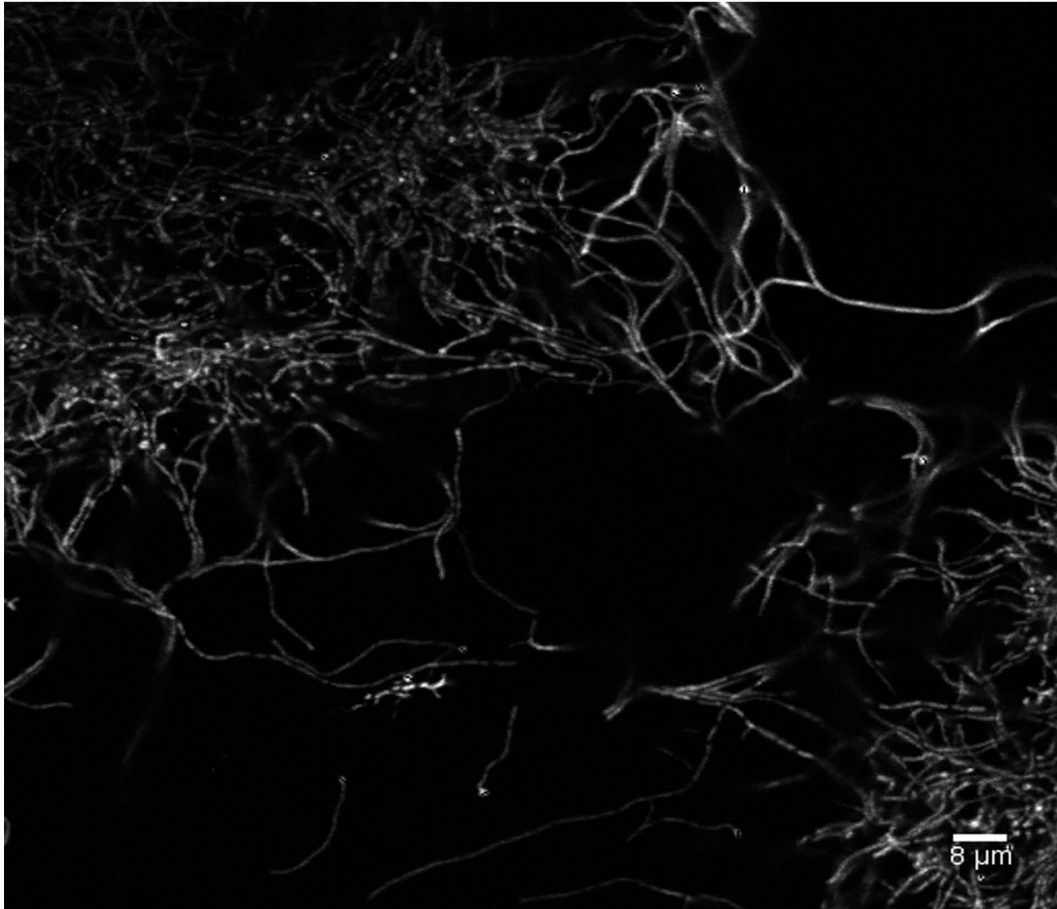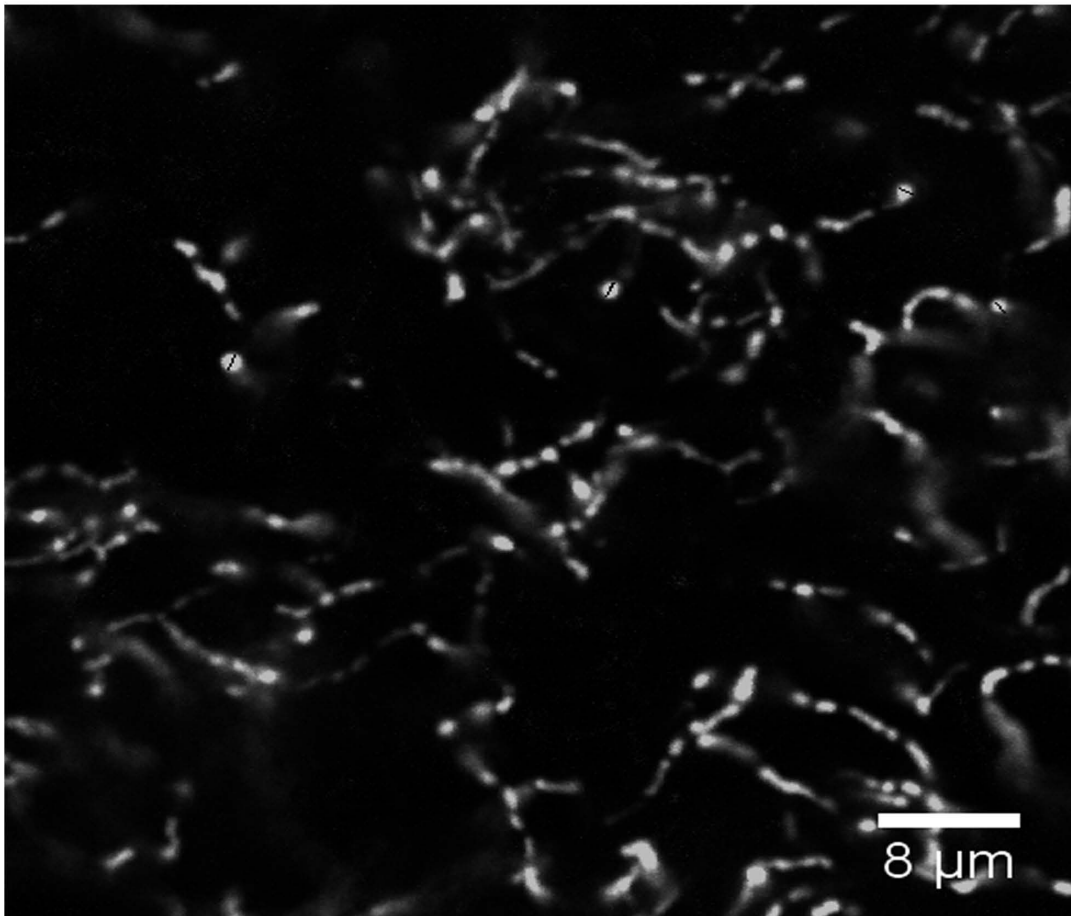

Supplement: 41598_2016_BFsrep21659_MOESM1_ESM.pdf [file 41598_2016_BFsrep21659_MOESM1_ESM.pdf]
